1           **The genetics and genome-wide screening of perennialism loci in *Zea diploperennis***

2   Anjun Ma<sup>1,\*</sup>, Yinjie Qiu<sup>1,\*†</sup>, Tajbir Raihan<sup>1</sup>, Bimal Paudel<sup>1</sup>, Subha Dahal<sup>1,‡</sup>, Yongbin Zhuang<sup>1,§</sup>,

3   Aravid Galla<sup>1,¶</sup>, Donald Auger<sup>1</sup> & Yang Yen<sup>1,#</sup>

4   **Author Affiliation:**

5   <sup>1</sup> Department of Biology and Microbiology, South Dakota State University, Brookings, SD  
6   57007, USA

7   \*: These authors made the equal contributions to this research

8   †: Current address: Department of Horticultural Science, University of Minnesota, St. Paul, MN  
9   55108, USA

10   ‡: Current address: Department of Molecular Genetics, University of Toronto, Toronto, ON M5S  
11   1A8, Canada;

12   §: Current address: College of Agronomy, Shandong Agricultural University, Taian, Shandong,  
13   271018, China

14   ¶: Current address: Department of Entomology, University of Arkansas, Fayetteville, AR 72701,  
15   USA

16   #: **Corresponding Author:** Dr. Yang Yen, SNP 249C, Box 2140D, Brookings, SD 57007, USA;  
17   +1-605-688-4567; [yang.yen@sdstate.edu](mailto:yang.yen@sdstate.edu)

18   **Classification:**

19           Major: Biological Science

20           Minor: Plant Biology

21   **Short Title:** Perennialism loci in *Zea*

22   **Key Words:** Perennial maize, teosinte, *Zea mays*, corn, genetics, perenniality, GBS

23 **Abstract**

24 Perennialism is common among the higher plants, yet we know little about its  
25 inheritance. To address this, six hybrids were made by reciprocally crossing perennial *Zea*  
26 *diploperennis* Iltis, Doebley & R. Guzman with three varieties/inbred lines of annual maize (*Z.*  
27 *mays* L. spp. *mays*). We specifically focused on the plant's ability to regrow after flowering and  
28 senescence. All the F<sub>1</sub> plants demonstrated senescence and regrowth for several cycles,  
29 indicating a dominant effect of the *Z. diploperennis* alleles. The regrowth ability was stably  
30 transmitted to progeny of the hybrids in segregation ratios that suggested the trait was controlled  
31 by two dominant, complementary loci. Genome-wide screening with genotyping-by-sequencing  
32 (GBS) identified two major regrowth loci *reg1* and *reg2* on chromosomes 2 and 7, respectively.  
33 GBS results were validated using a larger F<sub>2</sub> population and PCR markers derived from the  
34 single nucleotide polymorphisms within the locus intervals. These markers will be employed to  
35 select near-isogenic lines for the two loci and to identify candidate genes in the loci in *Z.*  
36 *diploperennis*.

37 **Significance Statement:** Our study contributes to our general understanding of inheritance  
38 of perennialism in the higher plants. Previous genetic studies of the perennialism in *Zea* have  
39 yielded contradictory results. We take a reductionist approach by specifically focusing on the  
40 plant's ability to regenerate new shoots after senescence without regard to associated traits, such  
41 as rhizome formation, tillering or environmental impacts. Using this criterion, inheritance of  
42 perennialism in *Zea* appears to be dominantly and qualitatively inherited. Importantly, our data  
43 indicate that there is no major barrier to transferring this trait into maize or other grass crops for  
44 perennial crop development, which enhances sustainability of grain crop production in an  
45 environmentally friendly way.

## 46 **Introduction**

47 Perennialism is the phenomenon that a plant can live for more than two years; the ability  
48 of doing so is termed perenniality. Plants typically have a life cycle of growth, reproduction  
49 (sexual and/or vegetative) and senescence. Annuals and biennials have only one such cycle in  
50 their life, leaving behind seeds, bulbs, tubers, etc. to initiate another life cycle. Some perennials  
51 maintain juvenile meristematic tissues capable of regrowth after senescence. How perennials do  
52 so remains as a mystery. Subterranean stems (such as rhizomes), polycarpy and tuberous roots  
53 are often cited as the means by which plants achieve perenniality. However, none of these traits  
54 is absolutely required by perennials. For instance, bamboos are essentially monocarpic perennial  
55 that regrow from rhizomes. Many perennial temperate grasses, such as switchgrass<sup>(1)</sup>,  
56 cordgrass<sup>(2)</sup> and eastern gamagrass<sup>(3)</sup>, regrow from the crowns instead of rhizomes. On the other  
57 hand, some annual/biennial plants, such as radish (*Raphanus sativus*), grow tuberous roots.

58 Although perennialism is common among higher plants, the study of its genetics and  
59 molecular biology is sporadic. So far, the only published research in molecular mechanism of  
60 plant perennialism was conducted in Arabidopsis. Melzer et al. successfully mutated this annual  
61 herb to show some perennial habits, such as increased woody fiber in the stem by down-  
62 regulating two flowering genes coding for MADS-box proteins, SUPPRESSOR OF  
63 OVEREXPRESSION OF CONSTANT 1 and FRUITFUL<sup>(4)</sup>. Unfortunately, this woody mutant  
64 was sterile, and no follow-up research was reported. Perennial-related genes and quantitative loci  
65 (QTL) have been reported in other species. Major QTL controlling rhizome development,  
66 regrowth and tiller number have been mapped on sorghum linkage groups C (chromosome 1)  
67 and D (chromosome 4)<sup>(5,6)</sup>, which are homoeologous to regions of maize chromosomes 1, 4, 5  
68 and 9, respectively<sup>(7)</sup>. Hu et al. mapped two dominant, complementary QTL *Rhz2*

69 (*Rhizomatousness 2*) and *Rhz3* that control rhizome production on rice chromosomes 3 and 4 at  
70 the loci homoeologous to the sorghum QTL<sup>(6)</sup>. Tuberous roots in a wild perennial mungbean  
71 (*Vigna radiate* ssp. *sublobata*) are conditioned by two dominant, complementary genes<sup>(8)</sup>.  
72 However, after years of effort these perennialism genes have yet to be cloned from any of the  
73 species despite that mapping data and complete rice and sorghum genomic sequences are readily  
74 available. Therefore, no further research has been reported about these perennialism loci/genes.

75 In the genus *Zea* L., most species, including maize, are annual. However, two closely  
76 related species, tetraploid *Z. perennis* [Hitc. ] Reeves and Mangelsdorf and diploid *Z.*  
77 *diploperennis* Iltis, Doebley & R. Guzman, are perennial. Perenniality of these two teosintes is  
78 manifested as regrowth after seed production and senescence, which includes developing  
79 juvenile basal axillary buds and rhizomes. Evergreen stalks, bulbils (highly-condensed  
80 rhizomes), basal shoot development, stiff stalk and robust root system have all been cited as  
81 phenotypic features of perennialism in *Z. diploperennis*<sup>(9-11)</sup>. For example, evergreen stalks,  
82 which was proposed as a component of perennialism in *Z. diploperennis*<sup>(9)</sup>, appears to be linked  
83 to *sugary 1* on the short arm of chromosome 4<sup>(12)</sup>.

84 Conflicting conclusions have been reached in various studies on how perennialism is  
85 inherited in *Zea*. Shaver<sup>(13)</sup> proposed that a triple homozygous recessive genotype is needed for  
86 the perenniality in *Zea*. In this model, *pe* (*perennialism*), interacting with *gt* (*grassy tillers*) and  
87 *id* (*indeterminate*), plays a key role in conferring totipotency to the basal axillary buds and  
88 rhizomes in the perennial teosintes<sup>(13, 14)</sup>. The nature of *pe* remains unknown and the *Z. perennis*-  
89 derived genotype from which *pe* was identified by Shaver<sup>(13)</sup> was lost and never recovered  
90 despite decades of intensive efforts (Shaver, personal communication). Mangelsdorf and Dunn  
91 mapped *Pe\*-d*, the maize allele of the *pe* homologue in *Z. diploperennis*, to the long arm of

92 maize chromosome 4<sup>(15)</sup>. The *gt* gene (aka *gt1*), located on the short arm of maize chromosome  
93 1, encodes a class I homeodomain leucine zipper that promotes lateral bud dormancy and  
94 suppresses elongation of lateral ear branches<sup>(12)</sup>. It appears that *gt1* depends on the activity of a  
95 major maize domestication gene, *teosinte branched 1* (*tb1*), and is inducible by shading<sup>(16)</sup>. The  
96 *id* gene (aka *id1*) alters maize's ability to flower<sup>(17)</sup>. Both *tb1* and *id1* are located on the long arm  
97 of maize chromosome 1 and both encode transcription factors with zinc finger motifs<sup>(16, 18)</sup>.  
98 Singleton believed that *id1* inhibits plantlet generation at the upper nodes of a maize stalk<sup>(17)</sup>.  
99 Mangelsdorf et al. proposed that one or two dominant genes control annual growth habit in their  
100 *Z. diploperennis*-popcorn hybrid<sup>(19)</sup>. Murray and Jessup also believed that non-senescence and  
101 rhizomatousness are the must-have characteristics of perennial maize<sup>(20)</sup>.

102 In contrast to the recessive inheritance model, Galinat proposed that perennialism in *Z.*  
103 *diploperennis* is at least partially controlled by two dominant complementary genes<sup>(12)</sup>. Also,  
104 Ting and Yu obtained three perennial F<sub>1</sub> hybrids by pollinating three Chinese field corn varieties  
105 with *Z. diploperennis*<sup>(21)</sup>, which indicate that perennial factors are dominant. Unfortunately, there  
106 is no further report about these hybrids or their derivatives. Westerbergh and Doebley regarded  
107 perennialism in *Z. diploperennis* as a quantitative trait and identified a total of 38 QTL for eight  
108 perennial-habit traits from a *Z. diploperennis* x *Z. mays* ssp. *parviglumis* (annual) mapping  
109 population<sup>(11)</sup>. Intriguingly, they did not identify any QTL that shows a singularly large effect.

110 The various criteria used by previous researchers for what constitutes perennialism in *Zea*  
111 may have contributed to the complex and contradictory observations. Traits such as rhizome  
112 formation and evergreen stalks may be important adaptive features that support the viability of  
113 perennial plants but are not key. In this study, we take a reductionist view and specifically focus  
114 on a plant's ability to regrow after senescence. Using this criterion, we have identified two

115 dominant, complementary loci that control this trait. Here we report the results of our genetic  
116 analysis and genome-wide screening of these regrowth loci with genotyping-by-sequencing  
117 (GBS) technology.

## 118 **Results and Discussion**

### 119 *The production and growth of the hybrids*

120 To study perennialism in *Zea*, we made reciprocal crosses of *Z. diploperennis* (Zd,  
121 hereafter in a cross combination) with the following three maize lines: B73, Mo17 and Rhee  
122 Flint (RF, hereafter in a cross combination). B73 and Mo17 are inbred lines and Rhee Flint is an  
123 heirloom maize variety. The first F<sub>1</sub> was made with Rhee Flint in a greenhouse. Rhee flint is  
124 small, fast-growing and usually has a few tillers, which affords serial plantings with an increased  
125 opportunity of a plant simultaneously flowering with *Z. diploperennis*. Because Rhee Flint is an  
126 open-pollinated variety, later F<sub>1</sub>s were made with B73 and Mo17 to facilitate molecular analysis.  
127 All the F<sub>1</sub> plants are perennial and fertile (Fig. 1), and have completed multiple cycles of growth,  
128 reproduction and senescence (Supplementary Fig. S1). Regrowth (as opposed to accidental  
129 replanting from seed) of F<sub>1</sub> plants was insured by inspection that new shoots were attached to the  
130 base of the F<sub>1</sub> and confirmed by the heterozygosity of polymorphic PCR markers (examples  
131 shown in Supplementary Fig. S2). Regrowth of these F<sub>1</sub>s originates mainly from basal axillary  
132 buds after stem senescence in all the crosses (Figs. 1D, 1E, 1F), but it also can occur at upper  
133 nodes of the F<sub>1</sub>s when B13 and Mo17 were used as the parent (Fig. 2C). The plantlets regrowing  
134 from the upper nodes, however, can only survive if transplanted into soil. This indicates that the  
135 senescent stalks do not function to provide the necessary nutrients to the plantlets. Interestingly,  
136 some of the basal regrowth immediately developed into a female (Fig. 2A) or a male (Fig. 2B)  
137 inflorescence, or a forest of them (Fig. 2D).

138           Because the F<sub>1</sub> plants and their perennial derivatives are not winter hardy, the  
139 regeneration cycles were alternated between the greenhouse and the field (Supplementary Figs.  
140 S1 & S3). Interestingly, the ears and kernels of the F<sub>1</sub>s of the six crosses all were more teosinte-  
141 like (i.e. two rows of oppositely positioned spikelets with paired kernels encased by wooden  
142 rachides and glumes) when grown in greenhouse but were more maize-like (i.e. multiple rows of  
143 naked kernels with short soft glumes and rachides around a silica-filled soft core) when grown in  
144 the field (Fig. 3). In the F<sub>2</sub> and higher generations, ear morphology segregated even under  
145 greenhouse condition (Fig. 3). These observations suggest that environmental factors play an  
146 important role in the preferential expression of the teosinte or the maize alleles of the genes  
147 influencing ear morphogenesis in the hybrids. These observations also indicate that it is possible  
148 to breed perennial maize with maize-like ears and kernels.

149           Some studies have used rhizome development as an indicator of perennialism in *Zea*<sup>(13, 14,</sup>  
150 <sup>19, 22)</sup>. We have not observed rhizomes in any of our F<sub>1</sub>s and the derived plants; when regrowth  
151 occurs, it is always from an axillary bud. Indeed, it is also our observation that the regrowth of *Z.*  
152 *diploperennis* is mainly from basal axillary buds, and only occasionally from rhizomes. Previous  
153 conclusions that perennialism in *Zea* is recessive might have resulted from the hypothesis that  
154 traits such as tiller number at tasseling (TNT) or rhizome development are indispensable  
155 components of perennialism in *Zea*. It is also possible that the perennial teosinte plants used in  
156 those studies were heterozygous for one or more perennialism genes. This opinion is supported  
157 by the observations of Shaver<sup>9</sup> and Camara-Hernandez and Mangelsdorf<sup>(18)</sup> that some of their F<sub>1</sub>  
158 plants regrew from basal axillary buds after a period of dormancy.

159           TNT has been associated with perennialism in several studies<sup>(11, 14, 23, 24)</sup>, so we  
160 investigated the relationship of TNT with regrowth in the Zd-RF F<sub>2</sub>s. One-way ANOVA of TNT

161 by regrowth (Supplementary Table S1), however, revealed no significant difference of TNT ( $F =$   
162  $0.897, p = 0.353$ ) between the regrowth and the non-regrowth  $F_2$ s. Indeed, we observed regrowth  
163 from several single-stalked hybrid derivatives (Fig. 4A) and non-regrowth of some multi-stalked  
164 plants (Fig. 4B). These results suggest that TNT is not essential to perenniality in *Zea*.

### 165 ***The genetics of the hybrids***

166 All our  $F_1$  plants are perennial and have undergone several growth cycles alternatively in  
167 greenhouse and field, demonstrating that regrowth is a dominant trait in *Zea*. Brewbaker  
168 suggested cytoplasm may contribute to perennialism<sup>(25)</sup>, but our reciprocal  $F_1$ s performed  
169 similarly, indicating that it does not. To analyze the genetics of regrowth further, 159 Zd-RF  $F_2$ s  
170 (derived from an  $F_1$  where Zd was the female) and 134 B73-Zd  $F_2$ s (derived from an  $F_1$  where  
171 B73 was the female) were tested. We did not grow the Mo17-Zd  $F_2$ s due to limited resources.  
172 Among the 159 Zd-RF  $F_2$ s, 90 regrew after senescence and 69 did not (Supplementary Table  
173 S2). Similarly, among the 134 B73-Zd  $F_2$ s, 81 regrew and 53 did not (Table 1; Supplementary  
174 Table S3). Three Zd-RF  $F_3$  populations (Supplementary Table S2) and one B73-Zd  $F_3$  population  
175 (Supplementary Table S3), each of which was derived from a single regrowth  $F_2$  plant, were also  
176 evaluated for their regrowth.

177 A chi square ( $\chi^2$ ) test of goodness-of-fit suggests that both of the  $F_2$  populations and one  
178 Zd-RF  $F_3$  population best fit the 9:7 regrowth to non-regrowth ratio (Table 2), and the B73-Zd  $F_3$   
179 population and two Zd-RF  $F_3$  populations best fits a 3:1 ratio (Table 2). The simplest model that  
180 explains these results is that regrowth in the  $F_1$ s and their derivatives is controlled by two  
181 dominant, complementary *regrowth* (*reg*) loci. The two dominant, complementary gene model  
182 parallels what has been found in other species, such as rice (*Oryza sativa*)<sup>(6)</sup>, Johnsongrass  
183 (*Sorghum halepense*)<sup>(5, 6, 26)</sup>, basin wildrye (*Leymus cinereus*)<sup>(27)</sup> and wild mungbean (*Vigna*



184 *radiate* ssp. *sublobata*)<sup>(8)</sup>.

185           The Zd-RF F<sub>1</sub> was also backcrossed to each parental line. All plants from the Zd  
186 backcross regrew, while only one of the 20 plants from the RF backcross showed regrowth.  
187 Therefore, alternative models, such as one or three dominant complementary genes, are not  
188 eliminated but are less probable (Table 2).

189           We noticed that the number of regrowth plants observed in any generation might be  
190 understated, because some plants initially recorded as non-regrowth eventually regrew after  
191 about two months of dormancy. It is possible, therefore, that some plants recorded as non-  
192 regrowth and discarded to open up greenhouse space may have possessed the ability to regrow.  
193 Furthermore, transplanting from the field to the greenhouse and *vice versa* was very stressful to  
194 the plants. It is possible that some regrowth plants were killed this way, resulting in a reduced  
195 number of regrowth plants. However, the estimated segregation ratios of regrowth to non-  
196 regrowth are reliable since they can be verified. For example, the 9:7 ratio of Zd-RF F<sub>2</sub>s were  
197 verified by the ratios of the Zd-RF F<sub>3</sub>s derived from single regrowth F<sub>2</sub> plants (Table 2).

198           Rice rhizomatousness gene *Rhz2* has been mapped to rice chromosomes 3<sup>(6)</sup> and sorghum  
199 chromosome 1<sup>(5, 6, 26)</sup>, which are both homoeologous to parts of maize chromosome 1<sup>(7)</sup>. Also, *gt1*  
200 and *idl*, which have been implicated with perenniality in *Zea*<sup>(8)</sup>, and *tbl*, which controls *gt1*<sup>(16)</sup>,  
201 are all on chromosome 1 in *Zea*<sup>(16, 18)</sup>. Therefore, we investigated the allele compositions of these  
202 three genes in the B73-Zd F<sub>2</sub>s (Table 1), and 26 Zd-RF F<sub>2</sub> plants and the three Zd-RF F<sub>3</sub>  
203 populations (Supplementary Table S4), and assayed their association with regrowth. Of the 131  
204 regrowth hybrid derivatives, 5, 33 and 115 were homozygous for the maize *gt1*, *tbl* or *idl*  
205 alleles, respectively. One Zd-RF F<sub>3</sub> family is homozygous for the *gt1* allele of *Z. diploperennis*  
206 (Supplementary Table S4) but segregates approximately 9:7 for regrowth and non-regrowth

207 (Table 2). Therefore, our results are inconsistent with the model of Shaver<sup>(13)</sup>, and show that *gt1*  
208 and *idl* do not control regrowth in our F<sub>1</sub>s and their derivatives. *Z. diploperennis*'s *gt1* allele  
209 may be helpful to regrowth because the majority of the plants that regrew had at least one copy,  
210 but it is not indispensable because many plants regrew without it.

211 Interestingly, we observed no heterozygosity for *idl* and much less-than-expected  
212 heterozygosity for *tbl* in all the hybrid derivatives that were examined, regardless of regrowth  
213 (Tables 1; Supplementary Table S4). Of the 134 B73-Zd F<sub>2</sub> plants investigated, only 16 had the  
214 *Z. diploperennis idl* allele (Table 1). Similar phenomena were observed in the derivatives of the  
215 Zd-RF cross (Supplementary Table S4). It seems that the maize chromosome fragment that  
216 carries *idl* was preferentially transmitted into the hybrid derivatives. Excess homozygosity of the  
217 maize *idl* allele indicates some sort of selection. It could be that a deficiency or other  
218 rearrangement adjacent to the teosinte *idl* allele causes it not to transmit efficiently, or it could  
219 be that the teosinte *idl* allele causes the plant not to grow well or flower in South Dakota.

#### 220 ***Identifying regrowth loci with genotyping-by-sequencing assay***

221 To identify chromosomal regions that host the two regrowth loci revealed by our genetic  
222 analysis, we conducted genome-wide mining of single nucleotide polymorphisms (SNPs) in a  
223 randomly selected sub-population of 94 (55 regrowth and 39 non-regrowth) B73-Zd F<sub>2</sub> plants  
224 with GBS technology (Supplementary Fig. S4). A total of 2,204,834 (85.14%) Illumina  
225 sequencing tags that passed routine quality control filtrations were aligned with B73 reference  
226 genome. A total of 714,158 SNPs were then called from 83 (46 regrowth and 37 non-regrowth,  
227 labeled in bold in Table 1) of the 94 F<sub>2</sub> plants using TASSEL pipeline<sup>(28, 29)</sup> (Supplementary Fig.  
228 S4). SNP-calling for the excluded 11 plants failed probably due to the failure of barcode addition  
229 before sequencing. These SNPs covered all ten chromosomes with an average of 71,416 SNPs

230 per chromosome (Table 4, Supplementary Fig. S5). As shown in Table 4, these SNPs were first  
231 subjected to a two-step filtration to remove those with low minor allele frequency ( $\leq 0.01$ ) or  
232 high missing data rate ( $>20\%$ ) among the  $F_2$  plants. The SNPs that passed the two filtrations  
233 were subjected to a  $\chi^2$  test for their fit to the two, dominant complementary locus model with the  
234 null hypothesis that the observed and the expected are not significantly different ( $p \leq 0.05$ ). We  
235 hypothesize that a SNP that is associated with one of the two regrowth factors should be carried  
236 by all the regrowth  $F_2$ s but one or both are missing from the non-regrowth  $F_2$ s. This step kept  
237 946 SNPs that have  $\chi^2_{0.05, 4} < 9.49$ . Finally, to simplify the mapping effort, the 946 SNPs were  
238 filtered once more by collapsing immediately neighboring SNPs that share the same haplotypes  
239 into one. The first SNP in such a cluster was chosen to represent the SNP cluster. This final  
240 filtering resulted in 597 SNPs with an overall average distance of 3.52 cM between them in the  
241 B73 reference genome. The distribution of these 597 SNPs in the B73 genome are shown in  
242 Supplementary Figure S5.

243 We then conducted locus analysis of the 597 SNPs together with additional 1,969  
244 simulated SNPs, using R/qtl package (version 1.40-8) with the “lodint()” arguments with LOD  
245 drop unit of 0.5 cM and the “expandtomarkers” arguments. The results are shown in Figure 5.  
246 Using the  $LOD_{95\%}$  threshold of 4.17, two candidate *reg* loci were identified with one on B73  
247 chromosome 2 in the interval from 24,244,192 bp (here and hereafter, the nucleotide position in  
248 the B73 reference sequence) to 28,975,747 bp with the peak at 27,934,739 bp and one on B73  
249 chromosome 7 in the interval from 2,862,253 bp to 6,681,861 bp with the peak at 5,060,739 bp  
250 (Fig. 5). This result supports the genetic model that two major genes control regrowth. Table 5  
251 shows the two representative SNPs for the two candidate *reg* loci on chromosomes 2 (*reg1*) and  
252 7 (*reg2*), and the adjacent maize genes in the B73 reference genome.

253 Genes *gt1* and *idl* on chromosome 1 were proposed to control perennialism in *Zea*<sup>(13)</sup>,  
254 and our LOD analysis located two weak peaks on chromosome 1, assisting regrowth (Fig. 5).  
255 One may wonder if these two loci are related to *gt1* and *idl*, respectively. However, these loci  
256 are at 82,273,951 bp and 177,235,112 bp, far away from *idl* (around 243,201,405 bp) and *gt1*  
257 (around 23,625,801 bp). This observation further indicates that *idl* and *gt1* are irrelevant to  
258 regrowth. Previous studies reported that *Z. diploperennis* carried perennialism-related *Pe\*-d* and  
259 an evergreen gene on chromosome 4<sup>(12, 15)</sup>. However, our data could not support these  
260 observations since no SNP on chromosome 4 significantly associates with regrowth (Fig. 5).

### 261 ***Validation of the candidate SNPs with genetic mapping***

262 To validate the association of the candidate SNPs with the trait of regrowth, we converted  
263 two SNPs at the peaks of the two candidate chromosomal intervals on chromosomes 2 and 7 into  
264 PCR markers (Table 6). The markers for the peak SNPs were designated S2-2 and S7-1/S7-2,  
265 respectively (see Materials and Methods for an explanation of the names). The 134 B73-Zd F<sub>2</sub>  
266 population were screened with these PCR markers (Table 1, Supplementary Figs. S6 to S8). The  
267 hypothesis is that the PCR markers are linked with the regrowth trait, so a  $\chi^2$  test of  
268 independence was used to test the alternative hypothesis that the markers segregate  
269 independently with the regrowth (Table 3). The test results ( $p \leq 0.0001$ ) indicated that the SNPs  
270 are indeed associated with regrowth.

271 If the S2-2 and the S7-1/S7-2 markers reliably mark the two dominant complementary  
272 loci that are necessary and sufficient for regrowth, then no regrowth plant should be homozygous  
273 for a maize allele at either locus and all non-regrowth plants should be homozygous recessive for  
274 at least one locus. A review of Table 1 indicates some exceptions: 17 regrowth plants are  
275 homozygous of the B73 allele for either S2-2 or S7-1/S7-2 and 16 non-regrowth that have at

276 least one *Z. diploperennis* allele at both loci. That is 26.8% of the 123 plants that can be scored  
277 for genotype/phenotype exceptions. These exceptions do not necessarily negate the two loci  
278 hypothesis because both genome-wide screening and genetic analyses reached the same  
279 conclusion. Three possible uncontrolled variables may have caused these exceptions:  
280 recombination between the marker and the *reg* locus it represents, mis-scoring of regrowth/non-  
281 regrowth phenotypes and mis-scoring of the PCR markers.

282         Recombination may explain some exceptions, but is unlikely to be a major contributor,  
283 considering the narrow ranges of the QTL peaks. We reviewed the SNPs among the 83 B73-Zd  
284 F<sub>2</sub> plants that were used for the SNP discovery; the estimated maximum rates of recombination  
285 between regrowth and the peak SNP represented by S2-2 and S7-2 for the QTL are 0.01% and  
286 0.03%, respectively (Supplementary Table S6). Therefore, recombination should not be an issue  
287 here.

288         Although the criterion for regrowth phenotyping was simple and reliable, there was still  
289 opportunity for mis-scoring. Some plants capable of regrowth may have been scored as non-  
290 regrowth because of the abnormality of their regrowth (Fig. 2) or because their regrowth may  
291 have been delayed or failed due to pre-mature mortality. Anecdotally, at least one “non-  
292 regrowth” plant that was discarded was observed later to have emerging shoots. Alternatively, a  
293 non-regrowth plant might have been scored as regrowth because of late developing tillers. The  
294 variability in morphology and timing of regrowth shoots indicate that modifiers influence this  
295 trait. Even so, unusual regrowth and delayed regrowth were the exceptions.

296         The major contributor to the exceptions is likely the reliability of the PCR markers. For  
297 each SNP, primers pair were designed to amplify only one allele. In order to reduce the  
298 possibility of amplifying the alternative allele, additional mismatches were incorporated into the

299 primers<sup>(30)</sup>. While avoiding false positives, this increases the rate of false negatives. Out of 134  
300 plants assayed, nine failed to produce a product for either allele using S2-2 (Table 1). An  
301 alternative marker for *reg1* on chromosome 2, S2-1, had six failures. Disregarding those failures,  
302 the apparent genotypes of S2-2 and S2-1 were different 43 times out of 119 comparisons (36%).  
303 Therefore, most differences appear to be due to failure of the marker of one allele or the other to  
304 amplify. The S7 primers were designed in a similar fashion as the S2 primers and are likely  
305 subject to the same problems. Thus, we believe that most of the genotype/phenotype exceptions  
306 are due to the imperfections of these markers.

307       Even so, these PCR markers will be valuable to produce and identify a pair of near-  
308 isogenic lines (NILs), each being homozygous dominant for one regrowth locus but homozygous  
309 recessive for the alternative. The expectation is that neither NIL is capable of regrowth. Genetic  
310 confirmation of the two *reg* loci will be made by a testcross between the NILs, which is expected  
311 to produce progeny that demonstrate regrowth. These NILs will also aid in the cloning the  
312 functional genes originating from the *Z. diploperennis* loci.

313       In summary, the results presented here indicate that perennialism in *Zea*, when defined as  
314 regrowth of shoots from basal axillary buds after senescence, is inherited dominantly and  
315 apparently qualitatively. Using this criterion, the inheritance of perennialism in *Zea* does not  
316 appear to be as complex as previously thought<sup>(11, 13, 14, 22)</sup>. Two regrowth loci, *reg1* and *reg2*,  
317 were mapped to chromosome 2 and chromosome 7, respectively. Even though our data point to  
318 two controlling factors, the data do not discount that perenniality in *Zea* is affected by modifiers  
319 and environment. Identification and the functional study of the candidate genes for *reg1* and *reg2*  
320 will initiate an understanding about the molecular mechanism of perenniality in *Zea* L.

## 321 **Materials and Methods**

322 Plant materials and phenotyping

323 *Zea diploperennis* (PI 462368) and *Z. mays* cv. Rhee Flint (PI 213764) were obtained  
324 from the USDA North Central Region Plant Introduction Station, Ames, IA. B73 and Mo17  
325 inbreds were from the collection of D. Auger and are traceable back to the Maize Genetics  
326 Cooperation Stock Center, Urbana/Champaign, IL. In our designations of F1s and their  
327 derivatives, the female parental is shown first. Plants were grown and controlled pollinations  
328 were made in the greenhouse during the winter and in the field during the summer in Brookings,  
329 SD. In the greenhouse, plants were maintained with a 16 h-light/8 h-dark cycle and 20/16 °C  
330 day/night temperature except to induce the floral transition, when two-month old plants were  
331 treated with a 10 h light/14 h dark cycle for four weeks.

332 Plants were scored as regrowth if they produced shoots from the basal axillary buds after  
333 the original stalks senesced. Occasionally, the hybrid-derived plants developed shoots that  
334 terminate in ears (“ear forest”) or tassels prior to senescence, these were not scored as regrowth.  
335 Rhizome and tuber development were visually investigated on plants that were dug from the soil  
336 after senescence. The number of tillers (TNT) per plant was investigated at tasseling stage. Ear  
337 and kernel morphology was visually examined and photographed.

338 PCR assay

339 DNA samples were isolated from young leaves using the CTAB procedure<sup>(31)</sup> and used  
340 for PCR-based marker assay. PCR assays were done using GoTaq Green Master Mix (Catalog#  
341 M7505, Promega, Madison, WI) at the following conditions: 95°C, 35 cycles of 95°C for 45 sec,  
342 55~62°C (primer dependent, see Table 6 for detail) for 1 min and 72°C for 1 min, and 72°C for  
343 10 min. The primer sets used in the assays and their annealing temperatures are list in Table 6.  
344 The annealing temperatures were determined using a 1°C-touchdown PCR step starting from

345 65°C. Several primer sets generate only a dominant marker for either the *Z. diploperennis* or *Z.*  
346 *mays* allele, so two primer sets were used in combination to genotype the corresponding locus.  
347 This is especially true for the SNP-derived markers S2-1, S2-2, S7-1 and S7-2. In order to  
348 reduce the likelihood of false positives, the S2 and S7 primers are designed not to be perfectly  
349 complementary to the target sequence<sup>(30)</sup>. This increases the likelihood of false negatives. For  
350 each *reg* locus, the peak SNP and a SNP immediately adjacent to it were chosen for marker  
351 development. The marker for the peak SNP of the QTL on the short arm of chromosome 2 is S2-  
352 2. A second marker for an adjacent SNP on chromosome 2 was also developed and named S2-1.  
353 We could not develop a single PCR marker for both the peak SNP (S7-2) on chromosome 7 QTL  
354 so a second one (S7-1) was designed for an immediately adjacent SNP. These two were used in  
355 combination as a single marker.

#### 356 SNP discovery

357 A GBS assay was conducted according to Elshire et al<sup>(28)</sup>. The preparation and  
358 sequencing of the library were conducted by the University of Wisconsin Biotechnology Center  
359 (UWBRC). Generally, DNA samples were digested with *ApeKI* restriction enzyme (RE), and  
360 unique barcodes were annealed to each DNA fragments. A single-end 100 bp (1x100bp)  
361 sequencing run was carried out on an Illumina HiSeq 2500 platform. The raw data were pooled  
362 as a single fastq file and downloaded from UWBRC along with a quality report (FastQC version  
363 0.11.2).

364 The TASSEL (Trait Analysis by Association, Evolution and Linkage) 3 pipeline was  
365 used under the guidance of TASSEL manual<sup>(29)</sup> for the discovery of SNPs between *Z.*  
366 *diploperennis* and *Z. mays* B73 (Supplementary Fig. S4). TASSEL 4 and 5 pipelines were used  
367 if command line was compatible. The barcoded sequence reads were collapsed into a set of



368 unique sequence tags with counts. The tag count files were filtered for a minimum count  
369 threshold and merged into the master tag count file. B73\_RefGen\_V4 reference genome  
370 sequence was downloaded from MaizeGDB and processed with Bowtie2 for alignment<sup>(32)</sup>.  
371 Master tags were aligned to the B73 reference genome to generate a "Tags On Physical Map"  
372 (TOPM) file, which contains the genomic position of each tag with the best unique alignment.  
373 The occupancies of tags for each taxon were observed from barcodes information in the original  
374 FASTQ files. Tag counts were stored in a "Tags by Taxa" (TBT) file. The TOPM and TBT files  
375 were used to call SNPs at the tag locations on the genome. The SNPs were filtered by minimum  
376 taxa coverage, minimum locus coverage and minimum minor allele frequency. Fastq files  
377 containing sequences of chromosomes 1 to 10 were merged by FASTX\_Toolkit and indexed. All  
378 commands for SNP discovery were executed in Ubuntu 16.04 LTS platform.

379         SNPs resulted from TASSEL filters plugin with a minimum minor allele frequency of  
380 0.01 were filtered again by removing sites that had missing data in more than 20% of the F<sub>2</sub>  
381 plants. For those SNPs that have missing data in less than 20% of the F<sub>2</sub> plants, the missing data  
382 were imputed by treating them as heterozygote since both two alleles can be embodied and  
383 considered to be moderate. SNPs were filtered again with  $\chi^2$  ( $p < 0.05$ ). The 4<sup>th</sup> SNP filter was  
384 performed by removing SNPs with positions very close to each other, in the range of 100 bp, and  
385 showed the exactly same haplotypes, keeping only the first SNP in the cluster. Thus, such a  
386 cluster of SNPs was treated as one locus. By removing the redundant SNPs, locus tests can be  
387 more precise because repeated SNP sites would affect the LOD value and influence the interval  
388 estimation.

389         The filtered SNPs were used for candidate locus estimation. The locus analysis was  
390 executed by a standard quantitative trait loci (QTL) procedure in R using the R/qtl package

391 (version 1.40-8)<sup>(33)</sup> to better observe the contribution of each SNP and its neighbors. The R codes  
392 are listed in Supplementary Table S5. Position simulation was drawn with a maximum distance  
393 of 1.0 cM and an error probability of  $1 \times 10^{-4}$ . The conditional genotype probability  
394 (calc.genoprob), as well as simulated genotypes (sim.geno with n.draw=32), were calculated.  
395 The “haldane” function was used to convert genetic distances into recombination fractions.  
396 Genome scan with a single locus model (scanone) was performed with a binary model using the  
397 expectation-maximization algorithm<sup>(33)</sup>. A permutation test with 1000 replicates was performed  
398 in scanone to visualize the LOD thresholds. We determined a locus interval by selecting the first  
399 and last SNP sites with significant LOD value. Genes within the intervals were identified by  
400 searching the corresponding region on the Gramene website.

#### 401 Statistical analyses

402 For statistical analyses, all genotypes and phenotypes were transformed into numeric  
403 values. For phenotypes, the regrowth plants were scored as “1” and the non-regrowth plants were  
404 scored as “0”. For genotypes, the plants that were homozygous to the *Z. diploperennis* allele  
405 were scored as “1”; those that were homozygous to the B73 allele were scored as “2”; and those  
406 that were heterozygous were scored as “3”. When conducting locus analysis, genotype “1” was  
407 transformed to “AA”, “2” to “BB” and “3” to “AB”.

408 A chi square goodness-of-fit test was used to find the best-fit model or linkage in the  
409 genetic analysis and reveal candidate SNPs. To determine if TNT has any correlation with  
410 regrowth, a One-Way ANOVA of TNT by regrowth was performed in JMP (JMP® 11.2.0).

#### 411 Sequencing Data availability

412 All raw fastq data from this study are available at NCBI data deposition site  
413 (<https://www.ncbi.nlm.nih.gov/bioproject/>) with accession number PRJNA477673.

414 **Acknowledgement** This research was partially supported by funds from USDA-NIFA via  
415 South Dakota Experiment Station and Department of Biology and Microbiology, South Dakota  
416 State University. We greatly appreciate Dr. Frank M. You of Agriculture and Agri-Food Canada  
417 for his help in statistics.

418 **Author Contributions** Y.Y. designed and supervised this project and all the experiments,  
419 and drafted the manuscript; Y.Q., A.M, T.R., B.P., A.G., Y.Z., Y.Y. & D.A. performed the  
420 experiments and collected data; Y.Q., A.M., T.R., D.A. & Y.Y. analyzed the data; all authors  
421 discussed the results and communicated on and approved the final manuscript.

422 **Competing financial interests** The authors declare no competing financial interests.

## 423 **References**

- 424 1. Haferkamp MR, Copeland TD (1984) Shoot growth and development of Alamo switchgrass  
425 as influenced by mowing and fertilization. *J Range Management* 37: 406-412.
- 426 2. Boe A, Owens V, Gonzalez-Hernandez J, Stein J, Lee DK, Koo BC. (2009) Morphology and  
427 biomass production of prairie cordgrass on marginal lands. *GCB Bioenergy* 1:240-250.
- 428 3. Jackson LL, Dewald CL (1994) Predicting evolutionary consequences of greater  
429 reproductive effort in *Tripsacum dactyloides*, a perennial grass. *Ecology* 75:627-641.
- 430 4. Melzer S, Lens F, Gennen J, Vanneste S, Rohde A, Beeckman T (2008) Flowering-time  
431 genes modulate meristem determinacy and growth form in *Arabidopsis thaliana*. *Nat Genet*  
432 40:1489-1492.
- 433 5. Paterson AH, Schertz KF, Lin Y, Liu S, Chang Y (1995) The weediness of wild plants:  
434 Molecular analysis of genes influencing dispersal and persistence of johnsongrass, *Sorghum*  
435 *halepense* (L.) Pers. *PNAS* 92:6127-6131.

- 436 6. Hu FY, Tao DY, Sacks E, Fu BY, Xu P, Li j, Yang Y, McNally K, Khush GS, Paterson AH,  
437 Li ZK (2003) Convergent evolution of perenniality in rice and sorghum. *PNAS* 100:4050-  
438 4054.
- 439 7. Wei F, Coe E, Nelson W, Bharti AK, Engler F, Butler E, et al. (2007) Physical and genetic  
440 structure of the maize genome reflects its complex evolutionary history. *PLoS Genet* 3: e123.
- 441 8. Nguyen TD, Lawn RJ, Bielig LM (2012) Expression and inheritance of perenniality and  
442 other qualitative traits in hybrids between mungbean cultivars and Australian wild  
443 accessions. *Crop & Pasture Sci* 63:619-634.
- 444 9. Galinat WC (1981a). Evergreen stalks as an indicator of perennialism. *MNL* 55:107.
- 445 10. Mangelsdorf PC, Dunn ME (1984a) Various expressions and dominance relations of  
446 perennialism. *MNL* 58:53.
- 447 11. Westerbergh A, Doebley J (2004) Quantitative trait loci controlling phenotypes related to the  
448 perennial versus annual habit in wild relatives of maize. *Theor Appl Genet* 109:1544-1553.
- 449 12. Galinat WC (1981b) The inheritance and linkage of perennialism derived from diploperennis.  
450 *MNL* 55:107.
- 451 13. Shaver DL (1967) Perennial maize. *J. Hered* 58:271-273.
- 452 14. Shaver DL (1964) Perennialism in *Zea*. *Genetics* 50:393-406.
- 453 15. Mangelsdorf PC, Dunn ME (1984b) Linkage relations of Pe\*-d. *MNL* 58:54.
- 454 16. Whipple CJ, Kebrom TH, Weber AL, Yang F, Hall D, Meeley R, Schmidt R, Doebley J,  
455 Brutnell T, Jackson DP (2011) *grassy tillers1* promotes apical dominance in maize and  
456 responds to shade signals in the grasses. *PNAS* 108:E506-E512.
- 457 17. Singleton WR (1946) Inheritance of indeterminate growth in maize. *J Hered* 37:61-64.
- 458 18. Colasanti J, Yuan Z, Sundaresan V (1998) The *indeterminate* gene encodes a zinc finger

- 459 protein and regulates a leaf-generated signal required for the transition to flowering in maize.  
460 *Cell* 93:593-603.
- 461 19. Mangelsdorf PC, Roberts LM, Rogers S (1981) Crosses of *Zea diploperennis* with corn.  
462 *MNL* 55:19-21.
- 463 20. Murry SC, Jessup RW. 2013. Breeding and genetics of perennial maize: Progress,  
464 opportunities and challenges. In: *Perennial Crops for Food Security, Proceedings of the FAO*  
465 *Expert Workshop*, August 28-30, 2013, Rome, Italy, pp103-111.
- 466 21. Ting YC, Yu MK (1982) Further studies of F1 hybrids of maize x diploid perennial teosinte.  
467 *MNL* 56:35-36.
- 468 22. Camara-Hernandez J, Mangelsdorf PC (1981) Crosses of *Zea diploperennis* with corn. *MNL*  
469 55:15-17.
- 470 23. Doebley J, Stec A, Hubbard L (1997) The evolution of apical dominance in maize. *Nature*  
471 386:485-488.
- 472 24. Camara-Hernandez J, Mangelsdorf PC (1981) Crosses of *Zea diploperennis* with corn. *MNL*  
473 55:15-17.
- 474 25. Brewbaker JL (2007) Grassy tiller and sweet corn. *MNL* 81:12
- 475 26. Washburn JD, Murray SC, Burson BL, Klein RR, Jessup R. 2013. Targeted mapping of  
476 quantitative trait locus regions for rhizomatousness in chromosome SBI-01 and analysis of  
477 overwintering in a *Sorghum bicolor* X *S. propinquum* population. *Mol Breed* 31:153-162.
- 478 27. Yun L, Larson SR, Mott IW, Jensen KR, Staub JE (2014) Genetic control of rhizomes and  
479 genomic localization of a major-effect growth habit QTL in perennial wildrye. *Mol Genet*  
480 *Genomics* 289:383-397.
- 481 28. Elshire RJ, Glaubitz JC, Sun Q, Poland JA, Kawamoto K, Buckler ES, Mitchell SE (2011) A

- 482 robust, simple genotyping-by-sequencing (GBS) approach for high diversity species. *PLoS*  
483 *ONE* 6:e19379.
- 484 29. Glaubitz JC, Casstevens TM, Lu F, Harriman J, Elshire RJ, Sun Q, et al. (2014) TASSEL-  
485 GBS: A high capacity genotyping by sequencing analysis pipeline. *PLoS ONE* 9: e90346.
- 486 30. Liu J, Huang S, Sun M, Liu S, Liu Y, Wang W, Zhang X, Wang H, Hua W. (2012) An  
487 improved allele-specific PCR primer design method for SNP marker analysis and its  
488 application. *Plant Methods* 8:34. Doi:10.1186/1746-4811-8-34.
- 489 31. Doyle JJ, Doyle JL (1990) Isolation of plant DNA from fresh tissue. *Focus* 12:13-15.
- 490 32. Langmead B, Salzberg S (2012) Fast gapped-read alignment with Bowtie 2. *Nature Methods*  
491 9:357-359.
- 492 33. Broman KW, Wu H, Sen S, Churchill GA (2003) R/qtl: QTL mapping in experimental  
493 crosses. *Bioinformatics* 19:889-890.
- 494 34. Gupta MR, Chen Y (2010) Theory and use of the EM algorithm. *Foundations and Trends in*  
495 *Signal Processing* 4:223-296.

496 **Table legends:**

- 497 Table 1. The regrowth (R) and the non-regrowth (NR) phenotypes and the marker genotypes of  
498 *Zea diploperennis* (Zd), *Z. mays* B73 and their 134 F<sub>2</sub> plants\*.
- 499 Table 2. Results of the  $\chi^2$  goodness-of-fit tests of three genetic models.
- 500 Table 3. Results of the  $\chi^2$  goodness-of-fitness tests for independent assortment of regrowth and  
501 the SNP-derived PCR markers among the *Zea mays* B73 - *Z. diploperennis* F<sub>2</sub>  
502 population.
- 503 Table 4. The actions taken and the numbers of SNPs revealed in each filtration step of SNP  
504 analysis of *Zea mays* B13 - *Z. diploperennis* F<sub>2</sub> plants.

505 Table 5. Ranges (bp), peak SNP positions (bp), their LOD,  $\chi^2$  and  $P(\chi^2)$  of the two candidate  
506 *regrowth* (*reg1* and *reg2*) loci, and adjacent maize genes per B73RefGen\_V4.

507 Table 6. PCR primers and annealing temperatures.

508 **Figure legends:**

509 Figure 1. Photos of *Zea mays* and *Z. diploperennis* (Zd) F<sub>1</sub> plants. **A:** reciprocal Mo17-Zd (right)  
510 and Zd-Mo17 (left) F<sub>1</sub> plants; **B:** reciprocal B73-Zd (right) and Zd-B73 (left) F<sub>1</sub> plants; **C:** RF-Zd  
511 F<sub>1</sub> plant; **D:** regrowth of a Mo17-Zd F<sub>1</sub> plant; **E:** regrowth of a B73-Zd F<sub>1</sub> plant; and **F:** regrowth  
512 of a RF-Zd F<sub>1</sub> plant. B73, Mo17 and RF represent, respectively, inbred lines B73 and Mo17 and  
513 cultivar Rhee Flint of *Z. mays*.

514 Figure 2. Photos of abnormal F<sub>1</sub> plants of crosses of *Zea diploperennis* with *Z. mays* inbred lines  
515 B73 (A & B) and Mo17 (C) or cv. Rhee Flint (D).

516 Figure 3. Photos of the ears produced from a *Zea mays* cv Rhee Flint x *Z. diploperennis* F<sub>1</sub> plant  
517 in different seasons (the upper panel) and from F<sub>2</sub> in summer 2014 in greenhouse (the lower  
518 panel).

519 Figure 4. Photos of *Zea mays* Mo17-*Z. diploperennis* F<sub>2</sub> plants, showing regrowth from the basal  
520 node of a single-stalked plant (A) or non-regrowth from a multi-stalked plant (B).

521 Figure 5. LOD scores of 597 SNP markers and 1,969 simulated positions for candidate locus  
522 determination shown with 95% and 99% LOD thresholds. The thresholds were calculated with  
523 1000 permutation. Two significant QTL are indicated by the location of the peak SNPs.

524 **Supplementary documents:**

525 Supplementary Table S1. One-way ANOVA Analysis of tiller number at tasseling by regrowth.

526 Supplementary Table S2. Segregation of regrowth among the *Zea mays* cv Rhee Flint-*Z.*  
527 *diploperennis* F<sub>2</sub>S and F<sub>3</sub>S.

528 Supplementary Table S3. Segregation of regrowth among the *Zea mays* B73- *Z. diploperennis*  
529 F<sub>2</sub>S and F<sub>3</sub>S.

530 Supplementary Table S4. Phenotypes and the *gt1*, *idl* and *tb1* haplotypes of 26 F<sub>2</sub> plants and  
531 three F<sub>3</sub> populations of *Zea mays* cv Rhee Flint x *Z. diploperennis* cross.

532 Supplementary Table S5. R codes for candidate loci analysis.

533 Supplementary Table S6. The SNPs used for marker development, their positions in B73  
534 reference genome and the marker genotypes in *Zea diploperennis* (Zd), *Z. mays* B73 and 83 B73-  
535 Zd F<sub>2</sub> plants.

536 Supplementary Figure S1. A photo showing the growth of *Zea diploperennis* and its F<sub>1</sub> with *Z.*  
537 *mays* B73 or Mo17 in the field in the Summer 2017.

538 Supplementary Figure S2. An agarose gel image showing that two molecular markers confirmed  
539 the heterozygosity of a *Z. diploperennis*-*Z. mays* cv. Rhee Flint F<sub>1</sub> plant over three life-cycles.

540 Supplementary Figure S3. A photo showing the regrowth of the B73 - *Z. diploperennis* F<sub>4</sub>S in the  
541 summer, 2017.

542 Supplementary Figure S4. An illustration of the general process of TASSEL pipeline used in this  
543 study. The barcoded sequence reads are collapsed into a set of unique sequence tags with counts.  
544 The tag count files are filtered for minimum count threshold and merged into the master tag  
545 count file. Master tags are aligned to the reference genome to generate a "Tags On Physical



546 Map" (TOPM) file, which contains the genomic position of each tag with the best unique  
547 alignment. The occupancies of tags for each taxon are observed from barcodes information in the  
548 original FASTQ files. The TOPM and TBT files are used to call SNPs at the tag locations on the  
549 genome.

550 Supplementary Figure S5. Genetic map of the SNPs on each chromosome of *Zea mays* B73 after  
551 the filtration.

552 Supplementary Figure S6. Gel images show presence or absence of the dominant alleles of *Zea*  
553 *diploperennis* (Zd) or *Z. mays* B73 of the marker S2-1 for the *reg1* locus among 134 B73-Zd F<sub>2</sub>  
554 plants. The codes of the plants are listed on the top of the image as 1-1 refers to BZ2-001-1, etc.  
555 \* 1: homozygous Zd alleles; 2: homozygous B73 alleles; 3: heterozygous; GT: genotype; PT:  
556 phenotype; R: regrowth; NR: non-regrowth.

557 Supplementary Figure S7. Gel images showing presence or absence of the dominant allele of *Zea*  
558 *diploperennis* (Zd) or *Z. mays* B73 of the SNP marker S2-5 for the *reg1* locus among 134 B73-  
559 Zd F<sub>2</sub> plants. The codes of the plants are listed on the top of the image as 1-1 refers to BZ2-001-  
560 1, etc.

561 Supplementary Figure S8. Gel images showing presence or absence of the dominant *Zea*  
562 *diploperennis* (Zd) allele of marker S7-1 or *Z. mays* B73 allele of marker S7-2 for the *reg2* locus  
563 among 134 B73-Zd F<sub>2</sub> plants. The codes of the plants are listed on the top of the image as 1-1  
564 refers to BZ2-001-1, etc.

**Table 1.** The regrowth (R) and the non-regrowth (NR) phenotypes and the marker genotypes of *Zea diploperennis* (Zd), *Z. mays* B73 and their 134 F2 plants\*.

| Plant             | PT | <i>gt1</i> | <i>tb1</i> | <i>id1</i> | S2-1 | S2-2 | S7-1/<br>S7-2 | Plant             | PT | <i>gt1</i> | <i>tb1</i> | <i>id1</i> | S2-1 | S2-2 | S7-1/<br>S7-2 | Plant             | PT | <i>gt1</i> | <i>tb1</i> | <i>id1</i> | S2-1 | S2-2 | S7-1/<br>S7-2 |
|-------------------|----|------------|------------|------------|------|------|---------------|-------------------|----|------------|------------|------------|------|------|---------------|-------------------|----|------------|------------|------------|------|------|---------------|
| Zd                | R  | 1          | 1          | 1          | 1    | 1    | 1             | <b>BZ2-006-9</b>  | R  | 1          | 1          | 2          | 2    | 3    | 1             | BZ2-009-6         | R  | 1          | 1          | 2          | 1    | 3    | 3             |
| B73               | NR | 2          | 2          | 2          | 2    | 2    | 2             | <b>BZ2-006-10</b> | R  | 1          | 3          | 2          | 1    | 1    | 1             | BZ2-009-7         | NR | 1          | -          | 2          | 2    | 2    | 3             |
| <b>BZ2-001-1</b>  | R  | 1          | 3          | 2          | 3    | 1    | 1             | <b>BZ2-006-11</b> | NR | 3          | 2          | 2          | 3    | 3    | 3             | <b>BZ2-009-8</b>  | NR | 3          | 2          | 2          | 1    | 1    | 2             |
| <b>BZ2-001-2</b>  | R  | 3          | 3          | 1          | -    | 3    | 2             | <b>BZ2-006-12</b> | NR | 3          | 3          | 2          | 3    | 2    | 3             | <b>BZ2-009-9</b>  | R  | 3          | 1          | 2          | 2    | 3    | 2             |
| <b>BZ2-001-3</b>  | R  | 1          | 3          | 2          | 1    | 3    | 3             | <b>BZ2-006-13</b> | NR | 3          | 2          | 1          | -    | 2    | 1             | <b>BZ2-009-10</b> | NR | 1          | 3          | 2          | 3    | 2    | 2             |
| <b>BZ2-001-4</b>  | R  | 1          | 3          | 2          | 3    | 3    | 2             | <b>BZ2-006-14</b> | R  | 3          | 2          | 2          | 3    | 3    | 3             | <b>BZ2-009-11</b> | R  | 1          | 3          | 2          | 2    | 3    | 3             |
| <b>BZ2-001-5</b>  | R  | 1          | 1          | 2          | 1    | 1    | 1             | <b>BZ2-007-1</b>  | NR | 3          | 2          | 2          | 3    | 3    | 2             | <b>BZ2-009-12</b> | R  | 3          | 3          | 2          | 3    | 1    | 3             |
| <b>BZ2-002-1</b>  | NR | 1          | 3          | 2          | 1    | 1    | 3             | <b>BZ2-007-2</b>  | NR | 3          | 2          | 2          | 2    | 3    | 3             | <b>BZ2-010-1</b>  | R  | 3          | 2          | 2          | 2    | 3    | 3             |
| <b>BZ2-002-2</b>  | NR | 1          | 2          | 2          | 3    | 1    | 2             | <b>BZ2-007-3</b>  | R  | 1          | 2          | 2          | 3    | 3    | 3             | <b>BZ2-010-2</b>  | NR | -          | 3          | 2          | 2    | 2    | 3             |
| <b>BZ2-002-3</b>  | R  | 3          | 3          | 2          | 1    | 3    | 3             | <b>BZ2-007-4</b>  | R  | 3          | 2          | 2          | 2    | 2    | 3             | <b>BZ2-010-3</b>  | R  | 3          | 1          | 2          | 2    | 3    | 1             |
| <b>BZ2-002-4</b>  | R  | 3          | 2          | 1          | 1    | 3    | 3             | <b>BZ2-007-5</b>  | R  | 3          | 3          | 2          | 2    | 2    | 2             | <b>BZ2-010-4</b>  | R  | 3          | 2          | 1          | 2    | 3    | 1             |
| <b>BZ2-002-5</b>  | NR | 3          | 3          | 2          | 2    | 2    | 3             | <b>BZ2-007-6</b>  | NR | 3          | 3          | 2          | 3    | 3    | 3             | <b>BZ2-010-5</b>  | NR | 3          | 1          | 2          | 2    | 2    | 3             |
| <b>BZ2-002-6</b>  | NR | 3          | 2          | 2          | 1    | 2    | 3             | <b>BZ2-007-7</b>  | R  | 1          | 3          | 2          | 2    | 3    | 1             | <b>BZ2-010-6</b>  | R  | 3          | 2          | 2          | 3    | 3    | 3             |
| <b>BZ2-002-7</b>  | NR | 3          | 2          | 2          | 3    | 1    | 2             | <b>BZ2-007-8</b>  | R  | 3          | 1          | 2          | 2    | 2    | 1             | <b>BZ2-010-7</b>  | NR | 3          | 1          | 2          | 2    | 2    | 2             |
| <b>BZ2-002-8</b>  | R  | 1          | -          | 2          | -    | -    | 2             | <b>BZ2-007-9</b>  | R  | 3          | 1          | 2          | 3    | 3    | 3             | <b>BZ2-010-8</b>  | R  | 3          | 2          | 2          | 3    | 3    | 3             |
| <b>BZ2-002-9</b>  | R  | 3          | 2          | 2          | 1    | 1    | 1             | <b>BZ2-007-10</b> | NR | 1          | 3          | 2          | 3    | 3    | 3             | <b>BZ2-010-9</b>  | R  | 1          | 3          | 2          | 1    | 1    | 3             |
| <b>BZ2-002-10</b> | R  | 3          | 3          | 2          | 3    | -    | 3             | <b>BZ2-007-11</b> | NR | 3          | 1          | 2          | 2    | 3    | 2             | <b>BZ2-010-10</b> | R  | 3          | 2          | 2          | 3    | 2    | 3             |
| <b>BZ2-002-11</b> | NR | 1          | 2          | 1          | 2    | -    | 2             | <b>BZ2-007-12</b> | R  | 1          | 2          | 2          | 3    | 3    | 3             | <b>BZ2-010-11</b> | R  | 2          | 3          | 2          | 3    | 3    | 3             |
| <b>BZ2-002-12</b> | R  | 1          | 2          | 2          | 3    | 3    | 2             | <b>BZ2-007-13</b> | R  | 3          | 1          | 2          | 3    | 3    | 1             | <b>BZ2-010-12</b> | NR | 2          | 3          | 2          | 3    | 3    | 3             |
| <b>BZ2-002-13</b> | R  | 3          | 3          | 2          | 3    | 3    | -             | <b>BZ2-007-14</b> | NR | 1          | 3          | 2          | 3    | 3    | 2             | <b>BZ2-010-13</b> | R  | 3          | 3          | 2          | 1    | 3    | 2             |
| <b>BZ2-002-14</b> | NR | 1          | 1          | 2          | 1    | 1    | 3             | <b>BZ2-007-15</b> | NR | 3          | 1          | 2          | 3    | 3    | 2             | <b>BZ2-010-14</b> | R  | 1          | 2          | 2          | 3    | 1    | 1             |
| <b>BZ2-002-15</b> | R  | 1          | 3          | 1          | 3    | 3    | 2             | <b>BZ2-007-16</b> | R  | 1          | 3          | 2          | 1    | 3    | 3             | <b>BZ2-010-15</b> | NR | 3          | 3          | 2          | 2    | 1    | 3             |
| <b>BZ2-002-16</b> | R  | 3          | 3          | 1          | 1    | 1    | 3             | <b>BZ2-007-17</b> | NR | 1          | -          | 1          | 2    | -    | -             | <b>BZ2-010-16</b> | NR | 1          | 3          | 2          | 3    | 2    | 3             |
| <b>BZ2-002-17</b> | NR | 3          | 2          | 2          | 3    | -    | -             | <b>BZ2-007-18</b> | R  | 1          | 1          | 2          | 2    | 3    | 1             | <b>BZ2-010-17</b> | R  | 1          | 3          | 2          | 3    | 2    | 3             |
| <b>BZ2-002-18</b> | R  | 1          | 2          | 2          | 1    | 1    | 1             | <b>BZ2-007-19</b> | R  | 3          | 2          | 2          | 3    | 3    | 3             | <b>BZ2-010-18</b> | NR | 3          | 3          | 2          | 3    | 3    | 3             |
| <b>BZ2-002-19</b> | R  | 1          | 2          | 2          | 3    | 3    | 3             | <b>BZ2-007-20</b> | R  | 3          | 2          | 2          | 3    | 3    | 1             | <b>BZ2-010-19</b> | R  | 2          | 2          | 1          | 1    | 1    | 1             |
| <b>BZ2-002-20</b> | R  | 1          | 2          | 2          | 3    | 3    | 2             | <b>BZ2-007-21</b> | NR | 3          | 2          | 2          | 2    | 1    | 2             | <b>BZ2-010-20</b> | NR | 1          | 2          | 1          | 2    | -    | -             |
| <b>BZ2-002-21</b> | R  | 1          | 2          | 1          | 1    | -    | -             | <b>BZ2-008-1</b>  | R  | 1          | 1          | 2          | 3    | 3    | 2             | <b>BZ2-010-21</b> | NR | 3          | 3          | 2          | 3    | 3    | 3             |
| <b>BZ2-002-22</b> | R  | 3          | 2          | 2          | 3    | 3    | 3             | <b>BZ2-008-2</b>  | R  | 3          | 1          | 2          | 3    | 3    | 3             | <b>BZ2-011-1</b>  | NR | 1          | -          | 1          | -    | 1    | 1             |
| <b>BZ2-002-23</b> | R  | 3          | 2          | 1          | 3    | 1    | 1             | <b>BZ2-008-3</b>  | R  | 3          | 1          | 2          | 1    | 3    | 3             | <b>BZ2-011-2</b>  | R  | 3          | 2          | 2          | 1    | 1    | 3             |
| <b>BZ2-002-24</b> | R  | 3          | 2          | 2          | 3    | 3    | 3             | <b>BZ2-008-4</b>  | NR | 3          | 2          | 2          | 2    | 3    | 1             | <b>BZ2-011-3</b>  | R  | 2          | 3          | 2          | 3    | 3    | 3             |
| <b>BZ2-002-25</b> | NR | 1          | 2          | 2          | 2    | 2    | 2             | <b>BZ2-008-5</b>  | R  | 3          | 3          | 2          | 2    | 2    | 3             | <b>BZ2-011-4</b>  | R  | 3          | 1          | 2          | 3    | 3    | 3             |
| <b>BZ2-004-1</b>  | R  | 3          | 1          | 2          | 3    | 3    | -             | <b>BZ2-008-6</b>  | NR | 3          | 2          | 2          | 3    | 2    | 3             | <b>BZ2-011-5</b>  | R  | 1          | -          | 1          | -    | 1    | 1             |
| <b>BZ2-004-2</b>  | R  | 1          | 3          | 2          | 3    | 1    | 1             | <b>BZ2-008-7</b>  | NR | 3          | 3          | 2          | 2    | 2    | 2             | <b>BZ2-011-6</b>  | NR | 3          | 2          | 2          | 3    | 3    | 2             |
| <b>BZ2-004-3</b>  | NR | 3          | 2          | 2          | 3    | 1    | -             | <b>BZ2-008-8</b>  | R  | 3          | 2          | 2          | 3    | 1    | 1             | <b>BZ2-011-7</b>  | NR | 1          | 2          | 2          | 2    | 2    | 3             |
| <b>BZ2-004-4</b>  | R  | 1          | 3          | 2          | 3    | 3    | 3             | <b>BZ2-008-9</b>  | NR | 3          | 2          | 2          | 2    | 3    | 3             | <b>BZ2-011-8</b>  | NR | 2          | 1          | 1          | 2    | -    | 1             |
| <b>BZ2-004-5</b>  | R  | 3          | 2          | 2          | 3    | 3    | 1             | <b>BZ2-008-10</b> | R  | 1          | 1          | 2          | 3    | 3    | 1             | <b>BZ2-011-9</b>  | R  | 3          | 2          | 2          | 3    | 3    | 1             |
| <b>BZ2-004-6</b>  | R  | 3          | 1          | 2          | -    | 1    | 2             | <b>BZ2-008-11</b> | NR | 3          | 2          | 2          | 2    | 1    | 2             | <b>BZ2-011-10</b> | R  | 3          | 1          | 2          | 3    | 1    | 3             |
| <b>BZ2-006-1</b>  | NR | 3          | 1          | 2          | 3    | 3    | -             | <b>BZ2-008-12</b> | R  | 3          | 3          | 2          | 2    | 3    | 3             | <b>BZ2-011-11</b> | R  | 1          | 2          | 2          | 3    | 3    | 3             |
| <b>BZ2-006-2</b>  | NR | 1          | 1          | 2          | 2    | 2    | 3             | <b>BZ2-008-13</b> | R  | 1          | 2          | 2          | 3    | 3    | 3             | <b>BZ2-011-12</b> | R  | 1          | 3          | 2          | 3    | 3    | 2             |
| <b>BZ2-006-3</b>  | R  | 3          | 3          | 2          | 3    | 3    | 3             | <b>BZ2-008-14</b> | NR | 1          | 3          | 2          | 2    | 2    | 2             | <b>BZ2-011-13</b> | R  | 3          | 1          | 2          | 3    | 3    | 1             |
| <b>BZ2-006-4</b>  | R  | 3          | 2          | 2          | 3    | 1    | 1             | <b>BZ2-009-1</b>  | NR | 3          | 3          | 2          | 3    | 3    | 3             | <b>BZ2-011-14</b> | NR | 3          | 1          | 2          | 3    | 3    | 3             |
| <b>BZ2-006-5</b>  | R  | 3          | 3          | 2          | 3    | 3    | 3             | <b>BZ2-009-2</b>  | R  | 1          | 3          | 1          | 3    | 3    | 3             | <b>BZ2-011-15</b> | NR | 3          | 3          | 2          | 3    | 1    | 3             |
| <b>BZ2-006-6</b>  | NR | 3          | 3          | 2          | 3    | 1    | 3             | <b>BZ2-009-3</b>  | NR | 3          | 2          | 2          | 2    | 2    | 2             | <b>BZ2-011-16</b> | NR | 1          | 2          | 2          | 2    | -    | 3             |
| <b>BZ2-006-7</b>  | R  | 3          | 1          | 2          | 1    | 3    | 1             | <b>BZ2-009-4</b>  | R  | 1          | 3          | 2          | 1    | 3    | 1             |                   |    |            |            |            |      |      |               |
| <b>BZ2-006-8</b>  | R  | 3          | 1          | 2          | 2    | 2    | 3             | <b>BZ2-009-5</b>  | NR | 3          | 3          | 2          | 3    | 3    | 2             |                   |    |            |            |            |      |      |               |

\* Bold Plants were used for SNP calling in GBS; 1: homozygous Zd allele; 2: homozygous B73 allele; 3: heterozygous; -: missing data. *gt1*: grassy tillers 1; *tb1*: teosinte branched 1; *id1*: indeterminate 1; S2-1 and S2-2: SNP markers for *regrowth 1*; S7-1 and S7-2: SNP markers for *regrowth 2* (The two markers are dominant, respectively, for the parents and thus used as a combined marker for *regrowth 2*).

**Table 2.** Results of the  $\chi^2$  goodness-of-fit tests of three genetic models

| Populations             | Observed |    |    | No. dominant genes (the expected R to NR ratio) and $P(\chi^2)^*$ |               |           |
|-------------------------|----------|----|----|-------------------------------------------------------------------|---------------|-----------|
|                         | Total    | R  | NR | 1 (3:1)                                                           | 2 (9:7)       | 3 (27:37) |
| B73-Zd F <sub>2</sub>   | 134      | 81 | 53 | 0.0001                                                            | <b>0.2964</b> | 0.0001    |
| B73-Zd F <sub>3</sub>   | 72       | 52 | 20 | <b>0.5862</b>                                                     | 0.0063        | 0.0001    |
| Zd-RF F <sub>2</sub>    | 160      | 92 | 68 | 0.0001                                                            | <b>0.7499</b> | 0.0001    |
| Zd-RF F <sub>3</sub> -3 | 15       | 12 | 3  | <b>0.6547</b>                                                     | 0.0639        | 0.3000    |
| Zd-RF F <sub>3</sub> -5 | 16       | 9  | 7  | 0.0833                                                            | <b>1.0000</b> | 0.2547    |
| Zd-RF F <sub>3</sub> -9 | 16       | 13 | 3  | <b>0.5637</b>                                                     | 0.0438        | 0.0016    |

\*: the best fit models are in bold.

**Table 3.** Results of the  $\chi^2$  goodness-of-fitness tests for independent assortment of regrowth and the SNP-derived PCR markers among the *Zea mays* B73 - *Z. diploperennis* F2 plants.

| Phenotypes     | Genotypes*<br>(ratio) | Numbers of Plants |     |         |       |           |       |
|----------------|-----------------------|-------------------|-----|---------|-------|-----------|-------|
|                |                       | S2-1              |     | S2-2    |       | S7-1/S7-2 |       |
|                |                       | Obs               | Exp | Obs     | Exp   | Obs       | Exp   |
| Regrowth       | <i>R_AA</i> (3/16)    | 18                | 24  | 18      | 23.44 | 26        | 23.64 |
|                | <i>R_Aa</i> (6/16)    | 45                | 48  | 53      | 46.88 | 40        | 47.25 |
|                | <i>R_aa</i> (3/16)    | 14                | 24  | 7       | 23.44 | 12        | 23.64 |
| Non-regrowth   | <i>rrAA</i> (1/16)    | 4                 | 8   | 12      | 7.813 | 4         | 7.86  |
|                | <i>rrAa</i> (2/16)    | 24                | 16  | 18      | 15.63 | 26        | 15.75 |
|                | <i>rraa</i> (1/16)    | 23                | 8   | 17      | 7.813 | 18        | 7.86  |
| $\chi^2, df=5$ |                       | 39.979            |     | 25.358  |       | 27.220    |       |
| $P(\chi^2)$    |                       | <0.0001           |     | <0.0001 |       | <0.0001   |       |

\* *R*: regrowth allele, *r*: non-regrowth allele; *A*: *Zea diploperennis* SNP allele; *a*: *Z. mays* SNP allele.

**Table 4.** The actions taken and the numbers of SNPs revealed in each filtration step of SNP analysis of *Zea mays* B13 - *Z. diploperennis* F2 plants.

| Steps                      | Actions                                                   | Numbers of SNPs on each chromosome |        |        |        |        |        |        |        |        |        | Total          |
|----------------------------|-----------------------------------------------------------|------------------------------------|--------|--------|--------|--------|--------|--------|--------|--------|--------|----------------|
|                            |                                                           | 1                                  | 2      | 3      | 4      | 5      | 6      | 7      | 8      | 9      | 10     |                |
| Raw                        | Before the filtration                                     | 109,543                            | 85,283 | 81,625 | 75,832 | 77,314 | 58,195 | 62,280 | 57,748 | 57,231 | 49,107 | <b>714,158</b> |
| The 1 <sup>st</sup> filter | Remove SNPs with MAF<0.01                                 | 5,751                              | 4,966  | 4,708  | 3,376  | 4,409  | 2,938  | 3,108  | 3,210  | 2,982  | 2,477  | <b>37,925</b>  |
| The 2 <sup>nd</sup> filter | Remove SNPs with missing data rate > 20%                  | 1,628                              | 1,476  | 1,200  | 942    | 1,197  | 761    | 877    | 877    | 741    | 732    | <b>10,431</b>  |
| The 3 <sup>rd</sup> filter | Remove SNPs with $\chi^2 > 9,49$                          | 82                                 | 120    | 120    | 112    | 198    | 87     | 144    | 20     | 29     | 34     | <b>946</b>     |
| The 4 <sup>th</sup> filter | Remove immediate neighboring SNPs with the same haplotype | 51                                 | 77     | 75     | 82     | 111    | 49     | 98     | 16     | 16     | 22     | <b>597</b>     |

**Table 5.** Ranges (bp), peak SNP positions (bp), LOD,  $\chi^2$  and  $P(\chi^2)$  of the two candidate *regrowth* (*reg1* and *reg2*) loci, and adjacent maize genes per B73RefGen\_V4.

| Loci        | Chr | The range<br>(the peak)                        | LOD   | $\chi^2$ | $P(\chi^2)$ | Gene              | Gene<br>position               | Annotation*                             |
|-------------|-----|------------------------------------------------|-------|----------|-------------|-------------------|--------------------------------|-----------------------------------------|
| <i>reg1</i> | 2   | 24,244,192<br>to<br>28,975,747<br>(27,934,739) | 4.944 | 4.097    | 0.393       | GRMZM2G002642     | 27,769,950<br>to<br>27,776,452 | Polypeptide:<br>Ankyrin-like<br>protein |
|             |     |                                                |       |          |             | Zm00001d002943    | 27,769,845<br>to<br>27,779,192 | NA                                      |
|             |     |                                                |       |          |             | AC199765.4_FGT008 | 27,777,537<br>to<br>27,779,027 | Enzyme:<br>Cellulase                    |
|             |     |                                                |       |          |             | Zm00001d002944    | 27,779,321<br>to<br>27,782,869 | NA                                      |
|             |     |                                                |       |          |             | GRMZM2G138125     | 27,929,562<br>to<br>27,938,867 | NA                                      |
|             |     |                                                |       |          |             | Zm00001d002950    | 27,929,335<br>to<br>27,938,856 | NA                                      |
| <i>reg2</i> | 7   | 2,862,253<br>to<br>6,681,861<br>(5,060,739)    | 4.764 | 7.029    | 0.134       | GRMZM2G048172     | 5,058,044<br>to<br>5,060,380   | NA                                      |
|             |     |                                                |       |          |             | Zm00001d018780    | 5,058,282<br>to<br>5,060,333   | NA                                      |

\*NA: no annotation

**Table 6.** PCR primers and annealing temperatures.

| Primers   | Sequences                      | Annealing T |
|-----------|--------------------------------|-------------|
| tb1MF     | 5' -AGTAGGCCATAGTACGTAC-3'     | 56°C        |
| tb1MR     | 5' -CTCTTTACCGAGCCCCTACA-3'    |             |
| tb1ZF     | 5' -ACTCAACGGCAGCAGCTACCTA-3'  | 62°C        |
| tb1ZR     | 5' -CGTGTGTGTGATCGAATGGT-3'    |             |
| tgalcF:   | 5' -AATAAAATAGAGGAACGTCA-3'    | 55°C        |
| tgalcR:   | 5' -TGCTGCAAAGGATTACTGAT-3'    |             |
| id1cF     | 5' -ACCGGACGGATCGAGAGAAA-3'    | 55°C        |
| id1cR     | 5' -CCGTACTCACTCGCAGATCG-3'    |             |
| mmc0381F: | 5' -GTGGCCCTGTTGATGAG-3'       | 55°C        |
| mmc0381R: | 5' -CGACGAGTACCAGGCAT-3'       |             |
| gt1-ZF:   | 5' -TCGCCTACATGACCGAGTAC-3'    | 60°C        |
| gt1-ZR:   | 5' -ATACTCTCAGCTGCTACGCG-3'    |             |
| gt1-MF:   | 5' -GAGACCGAGCTGCTGAAGAT-3'    | 58°C        |
| gt1-MR:   | 5' -TGTAGCTGTTGTAGGCGTACT-3'   |             |
| S2-1MF    | 5' -CTCTTCGCCTACTGCTAT-3'      | 60°C        |
| S2-1ZF    | 5' -CTCTTCGCCTACTGCTAC-3'      |             |
| S2-1R     | 5' -AATGTCAATGCAGACAAGCCT-3'   |             |
| S2-2MF    | 5' -CGATGGTGAACATGATAAACGGA-3' | 60°C        |
| S2-2MR    | 5' -TATGGCTTGATTTCGCTCTCTT-3'  |             |
| S2-2ZF    | 5' -CGATGGTGAACATGATAAATAGG-3' | 58°C        |
| S2-2ZR    | 5' -ACGCAAAAAGTATGGCTTGAT-3'   |             |
| S7-1MF    | 5' -CGTATCATCATAACGAGCATG-3'   | 63°C        |
| S7-1MR    | 5' -TGAATGAGCTCGATTGTGCC-3'    |             |
| S7-2ZF    | 5' -GTGCCTACGCTCCATCCGAA-3'    | 60°C        |
| S7-2ZR    | 5' -GTCGCTACCACTGTATCGCA-3'    |             |

**Supplementary Table S1.** Oneway ANOVA Analysis of tiller number at tasseling (TNT) by regrowth

| Source   | <i>Df</i> | Sum of Squares | Mean Square | F-Ratio | Prob>F |
|----------|-----------|----------------|-------------|---------|--------|
| Regrowth | 1         | 3.115385       | 3.11538     | 0.8967  | 0.3531 |
| Error    | 24        | 83.38462       | 3.47436     |         |        |
| Total    | 25        | 86.50000       |             |         |        |



**Supplementary Table S2.** Segregation of regrowth among the *Zea mays* cv Rhee Flint-*Z. diploperennis* F2s and F3s\*.

| Plant      | PT | Plant      | PT | Plant       | PT | Plant       | PT | Plant       | PT | Plant       | PT | Plant      | PT |
|------------|----|------------|----|-------------|----|-------------|----|-------------|----|-------------|----|------------|----|
| ZR2-001-1  | R  | ZR2-001-33 | NR | ZR2-001-69  | NR | ZR2-001-102 | R  | ZR2-001-132 | NR | ZR2-001-162 | NR | ZR3-005-7  | R  |
| ZR2-001-2  | NR | ZR2-001-34 | R  | ZR2-001-71  | R  | ZR2-001-103 | R  | ZR2-001-133 | R  | ZR2-001-163 | R  | ZR3-005-8  | R  |
| ZR2-001-3  | R  | ZR2-001-35 | NR | ZR2-001-72  | NR | ZR2-001-104 | R  | ZR2-001-134 | R  | ZR2-001-164 | R  | ZR3-005-9  | R  |
| ZR2-001-4  | NR | ZR2-001-36 | NR | ZR2-001-73  | R  | ZR2-001-105 | R  | ZR2-001-135 | NR | ZR2-001-165 | NR | ZR3-005-10 | R  |
| ZR2-001-5  | R  | ZR2-001-37 | NR | ZR2-001-74  | R  | ZR2-001-106 | R  | ZR2-001-136 | NR | ZR2-001-166 | R  | ZR3-005-11 | NR |
| ZR2-001-6  | R  | ZR2-001-38 | NR | ZR2-001-75  | R  | ZR2-001-107 | NR | ZR2-001-137 | R  | ZR2-001-167 | NR | ZR3-005-12 | NR |
| ZR2-001-7  | NR | ZR2-001-39 | R  | ZR2-001-77  | NR | ZR2-001-108 | NR | ZR2-001-138 | R  | ZR2-001-168 | NR | ZR3-005-13 | R  |
| ZR2-001-9  | R  | ZR2-001-40 | NR | ZR2-001-78  | NR | ZR2-001-109 | NR | ZR2-001-139 | R  | ZR2-001-169 | NR | ZR3-005-14 | NR |
| ZR2-001-10 | NR | ZR2-001-42 | NR | ZR2-001-79  | R  | ZR2-001-110 | R  | ZR2-001-140 | NR | ZR2-001-171 | R  | ZR3-005-15 | NR |
| ZR2-001-11 | R  | ZR2-001-43 | R  | ZR2-001-80  | R  | ZR2-001-111 | NR | ZR2-001-141 | R  | ZR3-003-1   | R  | ZR3-005-16 | NR |
| ZR2-001-12 | R  | ZR2-001-44 | R  | ZR2-001-81  | R  | ZR2-001-112 | R  | ZR2-001-142 | R  | ZR3-003-2   | R  | ZR3-009-1  | R  |
| ZR2-001-13 | NR | ZR2-001-45 | R  | ZR2-001-82  | NR | ZR2-001-113 | NR | ZR2-001-143 | R  | ZR3-003-3   | R  | ZR3-009-2  | R  |
| ZR2-001-14 | NR | ZR2-001-47 | NR | ZR2-001-83  | NR | ZR2-001-114 | NR | ZR2-001-144 | NR | ZR3-003-4   | NR | ZR3-009-3  | R  |
| ZR2-001-15 | R  | ZR2-001-48 | NR | ZR2-001-84  | R  | ZR2-001-115 | NR | ZR2-001-145 | R  | ZR3-003-6   | R  | ZR3-009-4  | R  |
| ZR2-001-16 | NR | ZR2-001-49 | R  | ZR2-001-85  | R  | ZR2-001-116 | R  | ZR2-001-146 | R  | ZR3-003-7   | R  | ZR3-009-5  | R  |
| ZR2-001-17 | R  | ZR2-001-51 | NR | ZR2-001-86  | R  | ZR2-001-117 | R  | ZR2-001-147 | R  | ZR3-003-8   | R  | ZR3-009-6  | NR |
| ZR2-001-18 | NR | ZR2-001-53 | NR | ZR2-001-87  | NR | ZR2-001-118 | NR | ZR2-001-148 | R  | ZR3-003-9   | R  | ZR3-009-7  | R  |
| ZR2-001-19 | NR | ZR2-001-54 | R  | ZR2-001-88  | NR | ZR2-001-119 | R  | ZR2-001-149 | R  | ZR3-003-10  | 1  | ZR3-009-8  | R  |
| ZR2-001-20 | R  | ZR2-001-55 | R  | ZR2-001-89  | NR | ZR2-001-120 | R  | ZR2-001-150 | R  | ZR3-003-11  | NR | ZR3-009-9  | R  |
| ZR2-001-21 | NR | ZR2-001-56 | R  | ZR2-001-90  | R  | ZR2-001-121 | NR | ZR2-001-151 | R  | ZR3-003-12  | R  | ZR3-009-10 | R  |
| ZR2-001-22 | NR | ZR2-001-57 | R  | ZR2-001-91  | R  | ZR2-001-122 | R  | ZR2-001-152 | NR | ZR3-003-13  | R  | ZR3-009-11 | R  |
| ZR2-001-23 | R  | ZR2-001-58 | NR | ZR2-001-92  | R  | ZR2-001-123 | NR | ZR2-001-153 | R  | ZR3-003-14  | R  | ZR3-009-12 | R  |
| ZR2-001-24 | R  | ZR2-001-59 | R  | ZR2-001-93  | R  | ZR2-001-124 | R  | ZR2-001-154 | R  | ZR3-003-15  | R  | ZR3-009-13 | R  |
| ZR2-001-25 | NR | ZR2-001-60 | R  | ZR2-001-94  | NR | ZR2-001-125 | R  | ZR2-001-155 | NR | ZR3-003-16  | NR | ZR3-009-14 | NR |
| ZR2-001-26 | R  | ZR2-001-62 | R  | ZR2-001-95  | NR | ZR2-001-126 | NR | ZR2-001-156 | R  | ZR3-005-1   | R  | ZR3-009-15 | NR |
| ZR2-001-27 | NR | ZR2-001-63 | R  | ZR2-001-97  | R  | ZR2-001-127 | NR | ZR2-001-157 | NR | ZR3-005-2   | R  | ZR3-009-16 | R  |
| ZR2-001-28 | NR | ZR2-001-64 | R  | ZR2-001-98  | R  | ZR2-001-128 | NR | ZR2-001-158 | NR | ZR3-005-3   | NR |            |    |
| ZR2-001-30 | R  | ZR2-001-65 | R  | ZR2-001-99  | R  | ZR2-001-129 | R  | ZR2-001-159 | NR | ZR3-005-4   | NR |            |    |
| ZR2-001-31 | R  | ZR2-001-67 | NR | ZR2-001-100 | R  | ZR2-001-130 | NR | ZR2-001-160 | R  | ZR3-005-5   | R  |            |    |
| ZR2-001-32 | R  | ZR2-001-68 | NR | ZR2-001-101 | R  | ZR2-001-131 | NR | ZR2-001-161 | R  | ZR3-005-6   | R  |            |    |

\*F2 are indicated by ZR2 and F3 are indicated by ZR3.

PT: phenotype  
R: regrowth  
NR: non-regrowth

**Supplementary Table S3.** Segregation of regrowth among the *Zea mays* cv B73 - *Z. diploperennis* F2s and F3s\*.

| Plant             | PT | Plant             | PT | Plant             | PT | Plant             | PT | Plant             | PT | Plant        | PT | Plant                                                                         | PT |
|-------------------|----|-------------------|----|-------------------|----|-------------------|----|-------------------|----|--------------|----|-------------------------------------------------------------------------------|----|
| BZ2-001-1         | R  | BZ2-004-1         | R  | BZ2-007-11        | NR | BZ2-009-6         | R  | BZ2-011-3         | R  | BZ3-010-1-18 | R  | BZ3-010-1-68                                                                  | NR |
| BZ2-001-2         | R  | BZ2-004-2         | R  | <b>BZ2-007-12</b> | R  | BZ2-009-7         | NR | <b>BZ2-011-4</b>  | R  | BZ3-010-1-19 | R  | BZ3-010-1-59                                                                  | R  |
| BZ2-001-3         | R  | <b>BZ2-004-3</b>  | NR | <b>BZ2-007-13</b> | R  | <b>BZ2-009-8</b>  | NR | BZ2-011-5         | R  | BZ3-010-1-20 | NR | BZ3-010-1-61                                                                  | NR |
| BZ2-001-4         | R  | BZ2-004-4         | R  | <b>BZ2-007-14</b> | NR | <b>BZ2-009-9</b>  | R  | <b>BZ2-011-6</b>  | NR | BZ3-010-1-22 | R  | BZ3-010-1-62                                                                  | R  |
| <b>BZ2-001-5</b>  | R  | <b>BZ2-004-5</b>  | R  | BZ2-007-15        | NR | <b>BZ2-009-10</b> | NR | <b>BZ2-011-7</b>  | NR | BZ3-010-1-23 | R  | BZ3-010-1-63                                                                  | R  |
| BZ2-002-1         | NR | <b>BZ2-004-6</b>  | R  | <b>BZ2-007-16</b> | R  | BZ2-009-11        | NR | <b>BZ2-011-8</b>  | NR | BZ3-010-1-24 | R  | BZ3-010-1-64                                                                  | NR |
| BZ2-002-2         | NR | <b>BZ2-006-1</b>  | NR | <b>BZ2-007-17</b> | NR | <b>BZ2-009-12</b> | R  | <b>BZ2-011-9</b>  | R  | BZ3-010-1-25 | R  | BZ3-010-1-67                                                                  | R  |
| BZ2-002-3         | R  | BZ2-006-2         | NR | <b>BZ2-007-18</b> | R  | <b>BZ2-010-1</b>  | R  | BZ2-011-10        | R  | BZ3-010-1-26 | R  | BZ3-010-1-68                                                                  | R  |
| BZ2-002-4         | R  | BZ2-006-3         | R  | <b>BZ2-007-19</b> | R  | <b>BZ2-010-2</b>  | NR | BZ2-011-11        | R  | BZ3-010-1-27 | R  | BZ3-010-1-69                                                                  | R  |
| BZ2-002-5         | NR | BZ2-006-4         | R  | <b>BZ2-007-20</b> | R  | <b>BZ2-010-3</b>  | R  | <b>BZ2-011-12</b> | R  | BZ3-010-1-30 | R  | BZ3-010-1-70                                                                  | R  |
| BZ2-002-6         | NR | BZ2-006-5         | R  | <b>BZ2-007-21</b> | NR | BZ2-010-4         | R  | <b>BZ2-011-13</b> | R  | BZ3-010-1-31 | R  | BZ3-010-1-71                                                                  | R  |
| <b>BZ2-002-7</b>  | NR | <b>BZ2-006-6</b>  | NR | BZ2-008-1         | R  | <b>BZ2-010-5</b>  | NR | <b>BZ2-011-14</b> | NR | BZ3-010-1-32 | R  | BZ3-010-1-72                                                                  | R  |
| BZ2-002-8         | R  | <b>BZ2-006-7</b>  | R  | <b>BZ2-008-2</b>  | R  | <b>BZ2-010-6</b>  | R  | BZ2-011-15        | NR | BZ3-010-1-33 | NR | BZ3-010-1-73                                                                  | R  |
| <b>BZ2-002-9</b>  | R  | BZ2-006-8         | R  | BZ2-008-3         | R  | <b>BZ2-010-7</b>  | NR | <b>BZ2-011-16</b> | NR | BZ3-010-1-34 | R  | BZ3-010-1-74                                                                  | R  |
| <b>BZ2-002-10</b> | R  | <b>BZ2-006-9</b>  | R  | BZ2-008-4         | NR | <b>BZ2-010-8</b>  | R  | BZ3-010-1-1       | R  | BZ3-010-1-35 | R  | BZ3-010-1-75                                                                  | R  |
| <b>BZ2-002-11</b> | NR | <b>BZ2-006-10</b> | R  | <b>BZ2-008-5</b>  | R  | <b>BZ2-010-9</b>  | R  | BZ3-010-1-2       | R  | BZ3-010-1-38 | NR | BZ3-010-1-76                                                                  | NR |
| BZ2-002-12        | R  | BZ2-006-11        | NR | <b>BZ2-008-6</b>  | NR | <b>BZ2-010-10</b> | R  | BZ3-010-1-3       | R  | BZ3-010-1-39 | R  | BZ3-010-1-77                                                                  | NR |
| BZ2-002-13        | R  | <b>BZ2-006-12</b> | NR | <b>BZ2-008-7</b>  | NR | <b>BZ2-010-11</b> | R  | BZ3-010-1-4       | R  | BZ3-010-1-40 | R  | BZ3-010-1-78                                                                  | R  |
| BZ2-002-14        | NR | BZ2-006-13        | NR | <b>BZ2-008-8</b>  | R  | <b>BZ2-010-12</b> | NR | BZ3-010-1-5       | R  | BZ3-010-1-41 | NR | BZ3-010-1-79                                                                  | R  |
| BZ2-002-15        | R  | <b>BZ2-006-14</b> | R  | <b>BZ2-008-9</b>  | NR | <b>BZ2-010-13</b> | R  | BZ3-010-1-6       | R  | BZ3-010-1-42 | NR | BZ3-010-1-80                                                                  | R  |
| BZ2-002-16        | R  | <b>BZ2-007-1</b>  | NR | <b>BZ2-008-10</b> | R  | BZ2-010-14        | R  | BZ3-010-1-7       | R  | BZ3-010-1-46 | NR | BZ3-010-1-81                                                                  | NR |
| <b>BZ2-002-17</b> | NR | BZ2-007-2         | NR | <b>BZ2-008-11</b> | NR | <b>BZ2-010-15</b> | NR | BZ3-010-1-8       | NR | BZ3-010-1-47 | R  | BZ3-010-1-82                                                                  | NR |
| <b>BZ2-002-18</b> | R  | <b>BZ2-007-3</b>  | R  | <b>BZ2-008-12</b> | R  | <b>BZ2-010-16</b> | NR | BZ3-010-1-9       | NR | BZ3-010-1-48 | R  | BZ3-010-1-83                                                                  | NR |
| BZ2-002-19        | R  | BZ2-007-4         | R  | <b>BZ2-008-13</b> | R  | BZ2-010-17        | R  | BZ3-010-1-11      | NR | BZ3-010-1-50 | R  | BZ3-010-1-84                                                                  | R  |
| BZ2-002-20        | R  | <b>BZ2-007-5</b>  | R  | <b>BZ2-008-14</b> | NR | <b>BZ2-010-18</b> | NR | BZ3-010-1-12      | R  | BZ3-010-1-51 | NR | BZ3-010-1-85                                                                  | R  |
| <b>BZ2-002-21</b> | R  | <b>BZ2-007-6</b>  | NR | <b>BZ2-009-1</b>  | NR | <b>BZ2-010-19</b> | R  | BZ3-010-1-13      | NR | BZ3-010-1-52 | R  | BZ3-010-1-87                                                                  | R  |
| <b>BZ2-002-22</b> | R  | <b>BZ2-007-7</b>  | R  | BZ2-009-2         | R  | <b>BZ2-010-20</b> | NR | BZ3-010-1-14      | NR | BZ3-010-1-53 | R  | <b>Bold: used for GBS</b><br>PT: phenotype<br>R: regrowth<br>NR: non-regrowth |    |
| <b>BZ2-002-23</b> | R  | BZ2-007-8         | R  | <b>BZ2-009-3</b>  | NR | BZ2-010-21        | NR | BZ3-010-1-15      | R  | BZ3-010-1-54 | R  |                                                                               |    |
| BZ2-002-24        | R  | BZ2-007-9         | R  | <b>BZ2-009-4</b>  | R  | BZ2-011-1         | NR | BZ3-010-1-16      | R  | BZ3-010-1-56 | R  |                                                                               |    |
| BZ2-002-25        | NR | <b>BZ2-007-10</b> | NR | <b>BZ2-009-5</b>  | NR | <b>BZ2-011-2</b>  | R  | BZ3-010-1-17      | R  | BZ3-010-1-57 | R  |                                                                               |    |

\* F2s are indicated by BZ2 and F3s are indicated by BZ3.

**Supplementary Table S4.** Phenotypes and the *gt1*, *id1* and *tb1* haplotypes of 26 F2 plants and three F3 populations of *Zea mays* cv Rhee Flint x *Z. diploperennis* cross.\*

| Line       | PT | <i>tb1</i> | <i>id1</i> | <i>gt1</i> | Line       | PT | <i>tb1</i> | <i>id1</i> | <i>gt1</i> | Line       | PT | <i>tb1</i> | <i>id1</i> | <i>gt1</i> |
|------------|----|------------|------------|------------|------------|----|------------|------------|------------|------------|----|------------|------------|------------|
| RZ2-001-1  | R  | 3          | 1          | 3          | RZ3-003-2  | R  | 1          | 2          | 1          | RZ3-005-13 | R  | 1          | 2          | 1          |
| RZ2-001-2  | NR | 2          | 2          | 2          | RZ3-003-3  | R  | 1          | 2          | 1          | RZ3-005-14 | NR | 1          | 2          | 1          |
| RZ2-001-3  | R  | 1          | 2          | 3          | RZ3-003-4  | NR | 1          | 2          | 3          | RZ3-005-15 | NR | 1          | 2          | 1          |
| RZ2-001-4  | NR | 2          | 2          | 2          | RZ3-003-6  | R  | 1          | 2          | 3          | RZ3-005-16 | NR | 1          | 2          | 1          |
| RZ2-001-5  | R  | 1          | 2          | 1          | RZ3-003-7  | R  | 1          | 2          | 1          | RZ3-009-1  | R  | 1          | 2          | 1          |
| RZ2-001-6  | R  | 3          | 1          | 1          | RZ3-003-8  | R  | 1          | 2          | 3          | RZ3-009-2  | R  | 1          | 2          | 2          |
| RZ2-001-7  | NR | 2          | 2          | 2          | RZ3-003-9  | R  | 1          | 2          | 3          | RZ3-009-3  | R  | 1          | 2          | 2          |
| RZ2-001-9  | R  | 1          | 2          | 3          | RZ3-003-10 | R  | 1          | 2          | 3          | RZ3-009-4  | R  | 1          | 2          | 3          |
| RZ2-001-10 | NR | 3          | 1          | 3          | RZ3-003-11 | NR | 1          | 2          | 3          | RZ3-009-5  | R  | 1          | 2          | 1          |
| RZ2-001-11 | R  | 2          | 2          | 3          | RZ3-003-12 | R  | 1          | 2          | 1          | RZ3-009-6  | NR | 1          | 2          | 2          |
| RZ2-001-12 | R  | 3          | 1          | 1          | RZ3-003-13 | R  | 1          | 2          | 3          | RZ3-009-7  | R  | 1          | 2          | 3          |
| RZ2-001-13 | NR | 3          | 1          | 3          | RZ3-003-14 | R  | 1          | 2          | 1          | RZ3-009-8  | R  | 1          | 2          | 1          |
| RZ2-001-14 | NR | 2          | 2          | 3          | RZ3-003-15 | R  | 1          | 2          | 1          | RZ3-009-9  | R  | 1          | 2          | 3          |
| RZ2-001-15 | R  | 3          | 1          | 1          | RZ3-003-16 | NR | 1          | 2          | 2          | RZ3-009-10 | R  | 1          | 2          | 3          |
| RZ2-001-16 | NR | 2          | 2          | 1          | RZ3-005-1  | R  | 1          | 2          | 1          | RZ3-009-11 | R  | 1          | 2          | 1          |
| RZ2-001-17 | R  | 3          | 1          | 3          | RZ3-005-2  | R  | 1          | 2          | 1          | RZ3-009-12 | R  | 1          | 2          | 3          |
| RZ2-001-18 | NR | 3          | 1          | 2          | RZ3-005-3  | NR | 1          | 2          | 1          | RZ3-009-13 | R  | 1          | 2          | 1          |
| RZ2-001-19 | NR | 3          | 1          | 2          | RZ3-005-4  | NR | 1          | 2          | 1          | RZ3-009-14 | NR | 1          | 2          | 3          |
| RZ2-001-20 | R  | 3          | 1          | 3          | RZ3-005-5  | R  | 1          | 2          | 1          | RZ3-009-15 | NR | 1          | 2          | 3          |
| RZ2-001-21 | NR | 2          | 2          | 3          | RZ3-005-6  | R  | 1          | 2          | 1          | RZ3-009-16 | R  | 1          | 2          | 1          |
| RZ2-001-22 | NR | 2          | 2          | 3          | RZ3-005-7  | R  | 1          | 2          | 1          | RZ3-012-1  | R  | 1          | 2          | 1          |
| RZ2-001-23 | R  | 2          | 2          | 3          | RZ3-005-8  | R  | 1          | 2          | 1          | RZ3-012-2  | R  | 1          | 2          | 1          |
| RZ2-001-24 | R  | 1          | 2          | 3          | RZ3-005-9  | R  | 1          | 2          | 1          | RZ3-012-3  | R  | 1          | 2          | 1          |
| RZ2-001-25 | R  | 2          | 1          | 1          | RZ3-005-10 | R  | 1          | 2          | 1          | RZ3-012-4  | R  | 3          | 1          | 1          |
| RZ2-001-26 | R  | 3          | 2          | 1          | RZ3-005-11 | NR | 1          | 2          | 1          | RZ3-012-5  | R  | 3          | 1          | 1          |
| RZ3-003-1  | R  | 1          | 2          | 3          | RZ3-005-12 | NR | 1          | 2          | 1          |            |    |            |            |            |

\* R: regrowth; NR: non-regrowth; 1: homozygous for the *Zea diploperennis* allele; 2: homozygous for the *Z. mays*'s allele; 3: heterozygous; F2s are indicated by RZ2 and F3s are indicated RZ3.

### Supplementary Table S5. R codes for candidate locus analysis

```
library(qtl)

all <- read.cross("csv", file="SNP.csv", genotypes = c("AA","AB", "BB"),
na.strings = "NA", alleles = c("A", "B"))

all <- calc.genoprob(all, step=1.0, off.end = 0.0, error.prob = 1.0e-
4,map.function = "haldane",stepwidth = "fixed")

all <- sim.geno(all, n.draws=32, step=1.0, off.end = 0.0, error.prob = 1.0e-
4,map.function = "haldane",stepwidth = "fixed")

all.scan1 <- scanone(all, pheno.col=2, model="binary", method = "em")

all.scan1.perm <- scanone(all, pheno.col = 2, model = "binary", method="em",
n.perm = 1000)

plot(all.scan1,main="LOD plot of regrowth",ylim = c(0,6))

threshold <- summary(all.scan1.perm, alpha=c(0.1, 0.05, 0.01))

abline(h=threshold[1], lty="dashed", lwd=1, col="blue")

abline(h=threshold[2], lty="dashed", lwd=1, col="yellow")

abline(h=threshold[3], lty="dashed", lwd=1, col="red")

summary(all.scan1, perm=all.scan1.perm, lodcolumn=1, alpha=0.1)

mkname1 <- find.marker(all, chr=2, pos=24.244290)

mkname2 <- find.marker(all, chr=7, pos=5.060739)

effectplot(all,pheno.col=2,mname1= mkname1), ylim=c(0,1))

effectplot(all,pheno.col=2,mname1= mkname2), ylim=c(0,1))

write.csv(all.scan1, "all.scan1.csv",row.names = TRUE)
```

**Supplementary Table S6.** The SNPs used for marker development, their positions in B73 reference genome and the marker genotypes in *Zea diploperennis* (Zd) and *Z. mays* B73 and 83 B73-Zd F2

| Plant      | PT | S2-1 (27774017 bp) |        | S2-2 (7934739 bp) |        | S7-1 (5835410 bp) |        | S7-2 (5060739 bp) |        | S7-1 /S7-2 |
|------------|----|--------------------|--------|-------------------|--------|-------------------|--------|-------------------|--------|------------|
|            |    | SNP                | Marker | SNP               | Marker | SNP               | Marker | SNP               | Marker |            |
| Zd         | R  | C                  | 1      | G                 | 1      | C/T               | 1      | A                 | -      | 1          |
| B73        | NR | T                  | 2      | A                 | 2      | C                 | -      | C                 | 2      | 2          |
| BZ2-001-4  | R  | C                  | 3      | A/G               | 3      | C                 | -      | C                 | 2      | 2          |
| BZ2-001-5  | R  | N                  | 1      | G                 | 1      | N                 | 1      | A                 | -      | 1          |
| BZ2-002-7  | NR | N                  | 3      | A                 | 1      | C                 | -      | C                 | 2      | 2          |
| BZ2-002-9  | R  | C                  | 1      | G                 | 1      | C                 | 1      | A                 | -      | 1          |
| BZ2-002-10 | R  | C                  | 3      | G                 | -      | C                 | 1      | N                 | 2      | 3          |
| BZ2-002-11 | NR | N                  | 2      | N                 | -      | N                 | -      | C                 | 2      | 2          |
| BZ2-002-17 | NR | N                  | 3      | N                 | -      | N                 | -      | C                 | -      | -          |
| BZ2-002-18 | R  | C                  | 1      | G                 | 1      | C                 | 1      | A                 | -      | 1          |
| BZ2-002-21 | R  | N                  | 1      | N                 | -      | N                 | -      | N                 | -      | -          |
| BZ2-002-22 | R  | C                  | 3      | A/G               | 3      | C                 | 1      | A/C               | 2      | 3          |
| BZ2-002-23 | R  | N                  | 3      | G                 | 1      | C                 | 1      | A                 | -      | 1          |
| BZ2-002-25 | NR | T                  | 2      | A                 | 2      | N                 | -      | N                 | 2      | 2          |
| BZ2-004-3  | NR | N                  | 3      | A                 | 1      | N                 | -      | C                 | -      | -          |
| BZ2-004-5  | R  | T                  | 3      | N                 | 3      | C                 | 1      | A                 | -      | 1          |
| BZ2-004-6  | R  | C                  | -      | G                 | 1      | N                 | -      | C                 | 2      | 2          |
| BZ2-006-1  | NR | T                  | 3      | A/G               | 3      | C                 | -      | C                 | -      | -          |
| BZ2-006-6  | NR | T                  | 3      | A/G               | 1      | C/T               | 1      | A/C               | 2      | 3          |
| BZ2-006-7  | R  | T                  | 1      | G                 | 3      | T                 | 1      | N                 | -      | 1          |
| BZ2-006-9  | R  | T                  | 2      | A/G               | 3      | T                 | 1      | A                 | -      | 1          |
| BZ2-006-10 | R  | C                  | 1      | G                 | 1      | T                 | 1      | A                 | -      | 1          |
| BZ2-006-12 | NR | T                  | 3      | A                 | 2      | N                 | 1      | A/C               | 2      | 3          |
| BZ2-006-14 | R  | C/T                | 3      | A/G               | 3      | C/T               | 1      | A/C               | 2      | 3          |
| BZ2-007-1  | NR | N                  | 3      | A/G               | 3      | C                 | -      | C                 | 2      | 2          |
| BZ2-007-3  | R  | N                  | 3      | A/G               | 3      | C/T               | 1      | A/C               | 2      | 3          |
| BZ2-007-5  | R  | T                  | 2      | A                 | 2      | C                 | -      | C                 | 2      | 2          |
| BZ2-007-6  | NR | C                  | 3      | G                 | 3      | C/T               | 1      | A                 | 2      | 3          |
| BZ2-007-7  | R  | C/T                | 2      | A/G               | 3      | T                 | 1      | A                 | -      | 1          |
| BZ2-007-10 | NR | C                  | 3      | G                 | 3      | T                 | 1      | A                 | 2      | 3          |
| BZ2-007-12 | R  | N                  | 3      | A/G               | 3      | N                 | 1      | A/C               | 2      | 3          |
| BZ2-007-13 | R  | C/T                | 3      | G                 | 3      | T                 | 1      | A                 | -      | 1          |
| BZ2-007-14 | NR | N                  | 3      | A/G               | 3      | C                 | -      | C                 | 2      | 2          |
| BZ2-007-16 | R  | C                  | 1      | A/G               | 3      | C/T               | 1      | A/C               | 2      | 3          |
| BZ2-007-17 | NR | T                  | 2      | N                 | -      | N                 | -      | C                 | -      | -          |
| BZ2-007-18 | R  | C                  | 2      | N                 | 3      | T                 | 1      | A                 | -      | 1          |
| BZ2-007-19 | R  | N                  | 3      | A                 | 3      | T                 | 1      | A/C               | 2      | 3          |
| BZ2-007-20 | R  | C/T                | 3      | G                 | 3      | T                 | 1      | A                 | -      | 1          |
| BZ2-007-21 | NR | C                  | 2      | N                 | 1      | C                 | -      | C                 | 2      | 2          |
| BZ2-008-2  | R  | C/T                | 3      | A/G               | 3      | C/T               | 1      | A/C               | 2      | 3          |
| BZ2-008-5  | R  | T                  | 2      | A                 | 2      | C                 | 1      | A/C               | 2      | 3          |

|            |    |     |   |     |   |     |   |     |   |   |
|------------|----|-----|---|-----|---|-----|---|-----|---|---|
| BZ2-008-6  | NR | N   | 3 | A/G | 2 | T   | 1 | A/C | 2 | 3 |
| BZ2-008-7  | NR | T   | 2 | A   | 2 | N   | - | C   | 2 | 2 |
| BZ2-008-8  | R  | N   | 3 | A/G | 1 | T   | 1 | A   | - | 1 |
| BZ2-008-9  | NR | T   | 2 | A   | 3 | N   | 1 | N   | 2 | 3 |
| BZ2-008-10 | R  | C   | 3 | A/G | 3 | T   | 1 | A   | - | 1 |
| BZ2-008-11 | NR | C   | 2 | N   | 1 | T   | - | N   | 2 | 2 |
| BZ2-008-12 | R  | C/T | 2 | A/G | 3 | C/T | 1 | A/C | 2 | 3 |
| BZ2-008-13 | R  | N   | 3 | A   | 3 | C/T | 1 | A/C | 2 | 3 |
| BZ2-008-14 | NR | N   | 2 | A   | 2 | C   | - | C   | 2 | 2 |
| BZ2-009-1  | NR | T   | 3 | A/G | 3 | C   | 1 | A   | 2 | 3 |
| BZ2-009-3  | NR | T   | 2 | A   | 2 | N   | - | A/C | 2 | 2 |
| BZ2-009-4  | R  | C   | 1 | G   | 3 | C   | 1 | A   | - | 1 |
| BZ2-009-5  | NR | T   | 3 | A/G | 3 | C   | - | N   | 2 | 2 |
| BZ2-009-8  | NR | C   | 1 | G   | 1 | C   | - | C   | 2 | 2 |
| BZ2-009-9  | R  | N   | 2 | G   | 3 | C   | - | C   | 2 | 2 |
| BZ2-009-10 | NR | N   | 3 | A   | 2 | C   | - | C   | 2 | 2 |
| BZ2-009-12 | R  | C/T | 3 | A/G | 1 | C   | 1 | A   | 2 | 3 |
| BZ2-010-1  | R  | N   | 2 | A/G | 3 | T   | 1 | A/C | 2 | 3 |
| BZ2-010-2  | NR | T   | 2 | A   | 2 | C/T | 1 | A/C | 2 | 3 |
| BZ2-010-3  | R  | N   | 2 | A/G | 3 | T   | 1 | A   | - | 1 |
| BZ2-010-5  | NR | T   | 2 | A   | 2 | C/T | 1 | A/C | 2 | 3 |
| BZ2-010-6  | R  | T   | 3 | A/G | 3 | T   | 1 | A/C | 2 | 3 |
| BZ2-010-7  | NR | T   | 2 | A   | 2 | C   | - | C   | 2 | 2 |
| BZ2-010-8  | R  | N   | 3 | N   | 3 | N   | 1 | N   | 2 | 3 |
| BZ2-010-9  | R  | C   | 1 | G   | 1 | C/T | 1 | A/C | 2 | 3 |
| BZ2-010-10 | R  | T   | 3 | N   | 2 | C   | 1 | C   | 2 | 3 |
| BZ2-010-11 | R  | C/T | 3 | A/G | 3 | C/T | 1 | A/C | 2 | 3 |
| BZ2-010-12 | NR | T   | 3 | A   | 3 | N   | 1 | A   | 2 | 3 |
| BZ2-010-13 | R  | C   | 1 | G   | 3 | C   | - | C   | 2 | 2 |
| BZ2-010-15 | NR | C   | 2 | N   | 1 | C/T | 1 | A/C | 2 | 3 |
| BZ2-010-16 | NR | T   | 3 | A   | 2 | T   | 1 | C   | 2 | 3 |
| BZ2-010-18 | NR | T   | 3 | N   | 3 | C/T | 1 | C   | 2 | 3 |
| BZ2-010-19 | R  | N   | 1 | G   | 1 | T   | 1 | A   | - | 1 |
| BZ2-010-20 | NR | N   | 2 | N   | - | C   | - | N   | - | - |
| BZ2-011-2  | R  | C   | 1 | G   | 1 | C/T | 1 | A/C | 2 | 3 |
| BZ2-011-4  | R  | T   | 3 | A/G | 3 | C/T | 1 | A/C | 2 | 3 |
| BZ2-011-6  | NR | T   | 3 | N   | 3 | C   | - | C   | 2 | 2 |
| BZ2-011-7  | NR | T   | 2 | A   | 2 | C   | 1 | C   | 2 | 3 |
| BZ2-011-8  | NR | N   | 2 | N   | - | N   | 1 | N   | - | 1 |
| BZ2-011-9  | R  | C   | 3 | A/G | 3 | T   | 1 | A   | - | 1 |
| BZ2-011-12 | R  | C   | 3 | G   | 3 | C   | - | C   | 2 | 2 |
| BZ2-011-13 | R  | C   | 3 | G   | 3 | T   | 1 | A   | - | 1 |
| BZ2-011-14 | NR | T   | 3 | A/G | 3 | C   | 1 | A/C | 2 | 3 |
| BZ2-011-16 | NR | T   | 2 | N   | - | N   | 1 | N   | 2 | 3 |

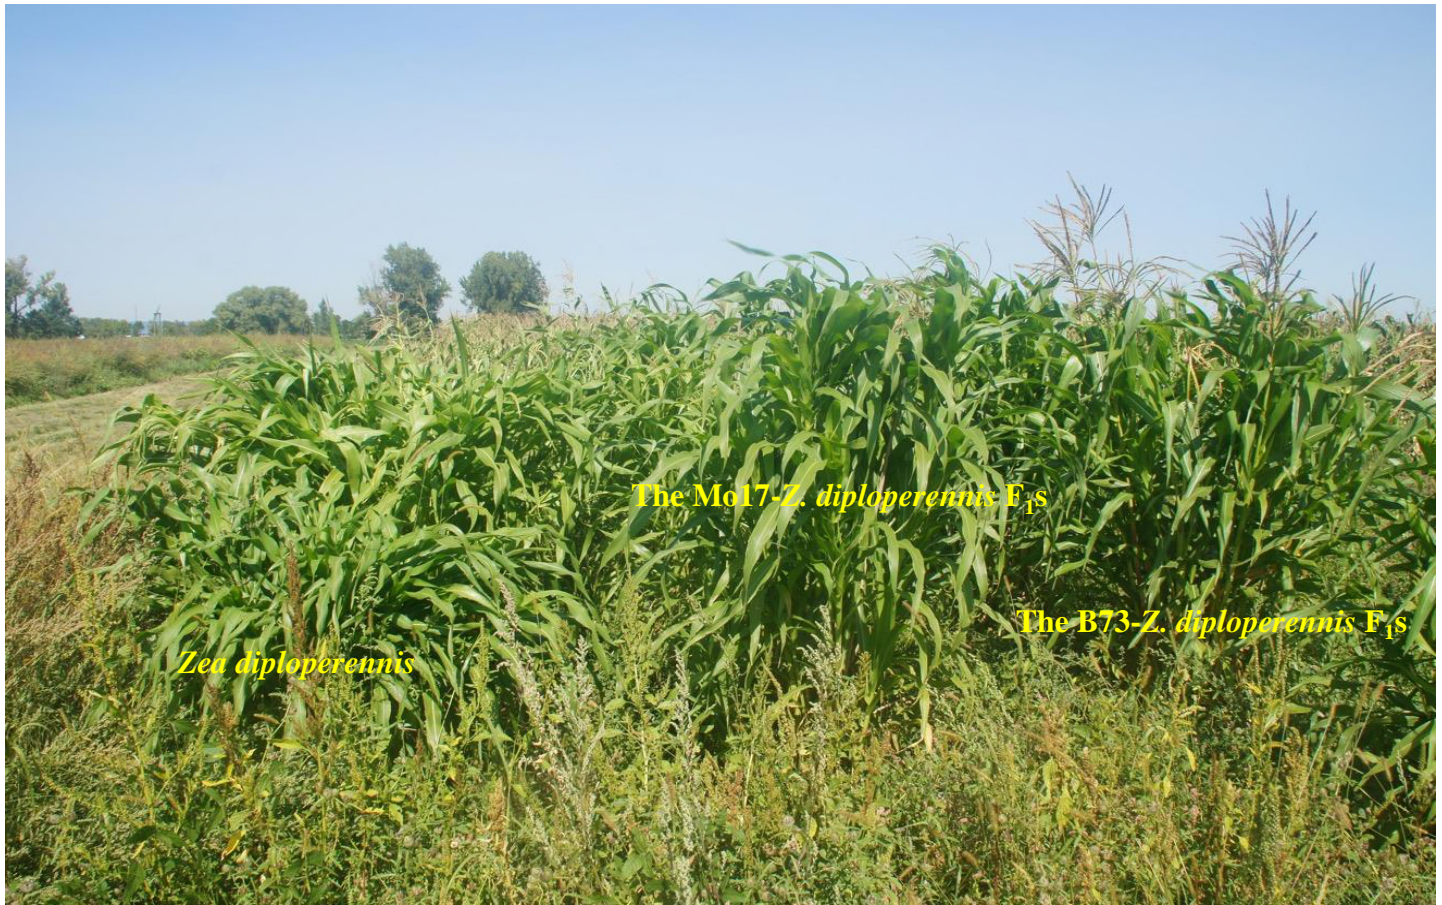

**Supplementary Figure S1.** A photo showing the growth of *Zea diploperennis* and its F<sub>1</sub> with *Z. mays* B73 or Mo17 in the field in the Summer 2017.

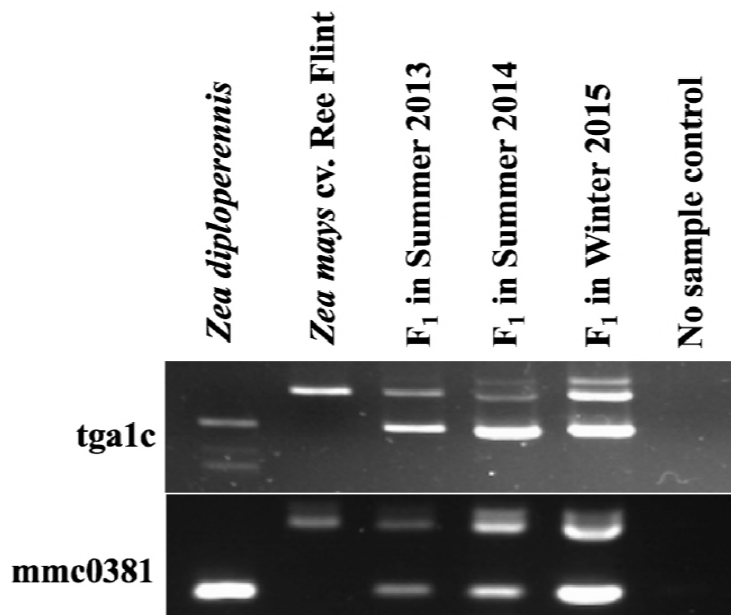

**Supplementary Figure S2.** An agarose gel image showing that two molecular markers confirmed the heterozygosity of a *Z. diploperennis*-*Z. mays* cv. Rhee Flint F<sub>1</sub> plant over three life-cycles.

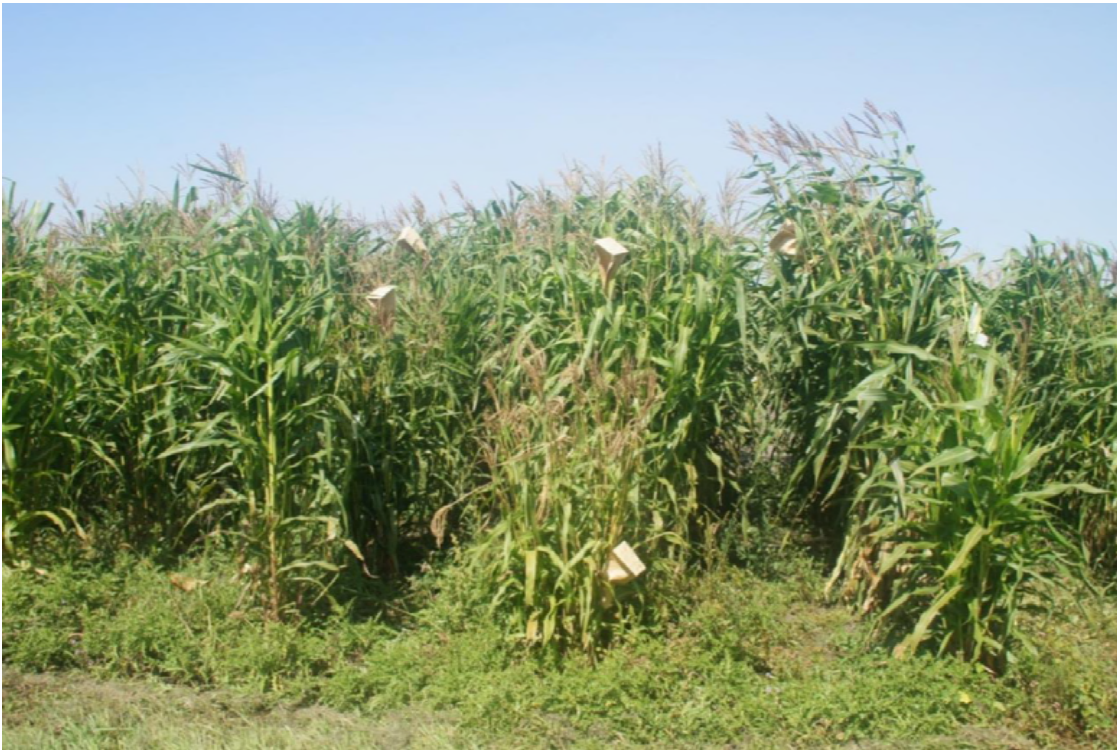

**Supplementary Figure S3.** A photo showing the growth of the B73 - *Z. diploperennis* regrowth F<sub>4</sub>s in the field in summer, 2017.



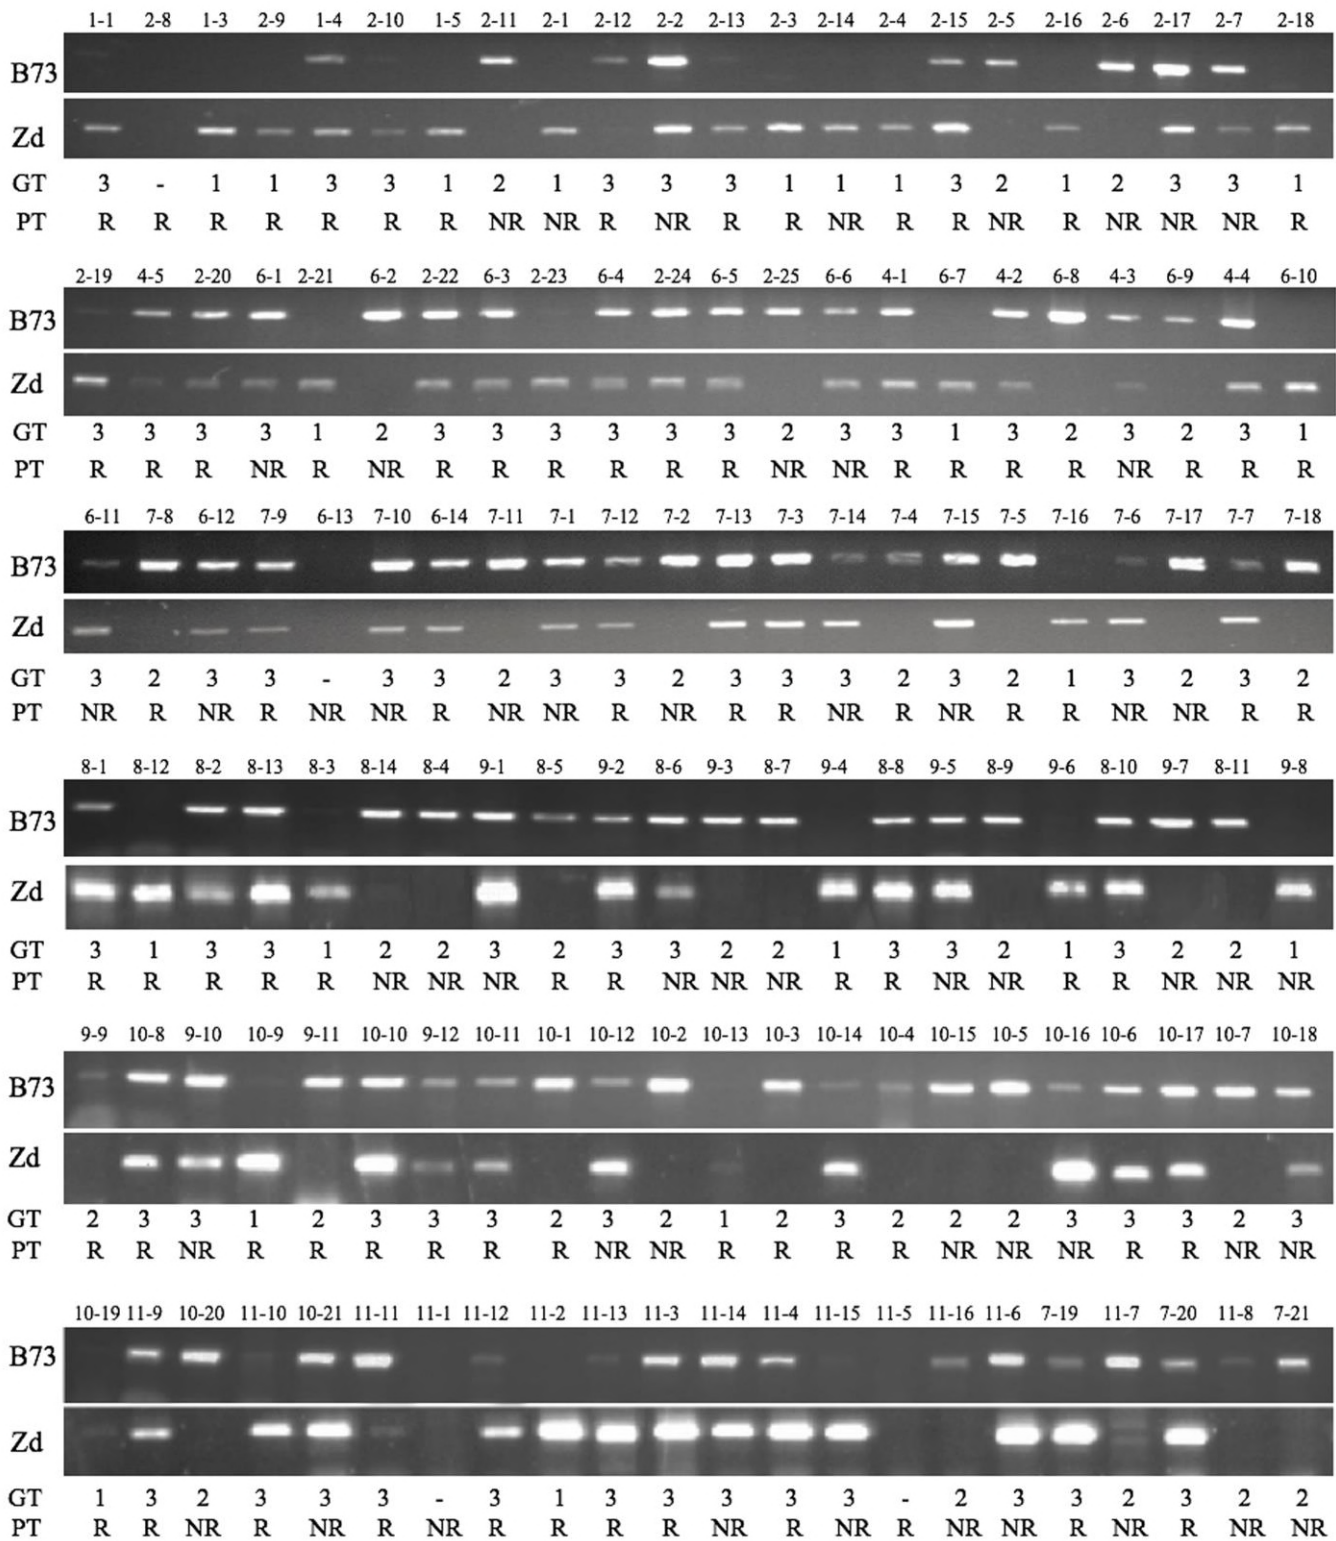

**Supplementary Figure S6.** Gel images show presence or absence of the dominant alleles of *Zea diploperennis* (Zd) or *Z. mays* B73 of the marker S2-1 for the *reg1* locus among 134 B73-Zd F<sub>2</sub> plants. The codes of the plants are listed on the top of the image as 1-1 refers to BZ2-001-1, etc.. \* 1: homozygous Zd alleles; 2: homozygous B73 alleles; 3: heterozygous; GT: genotype; PT: phenotype; R: regrowth; NR: non-regrowth.

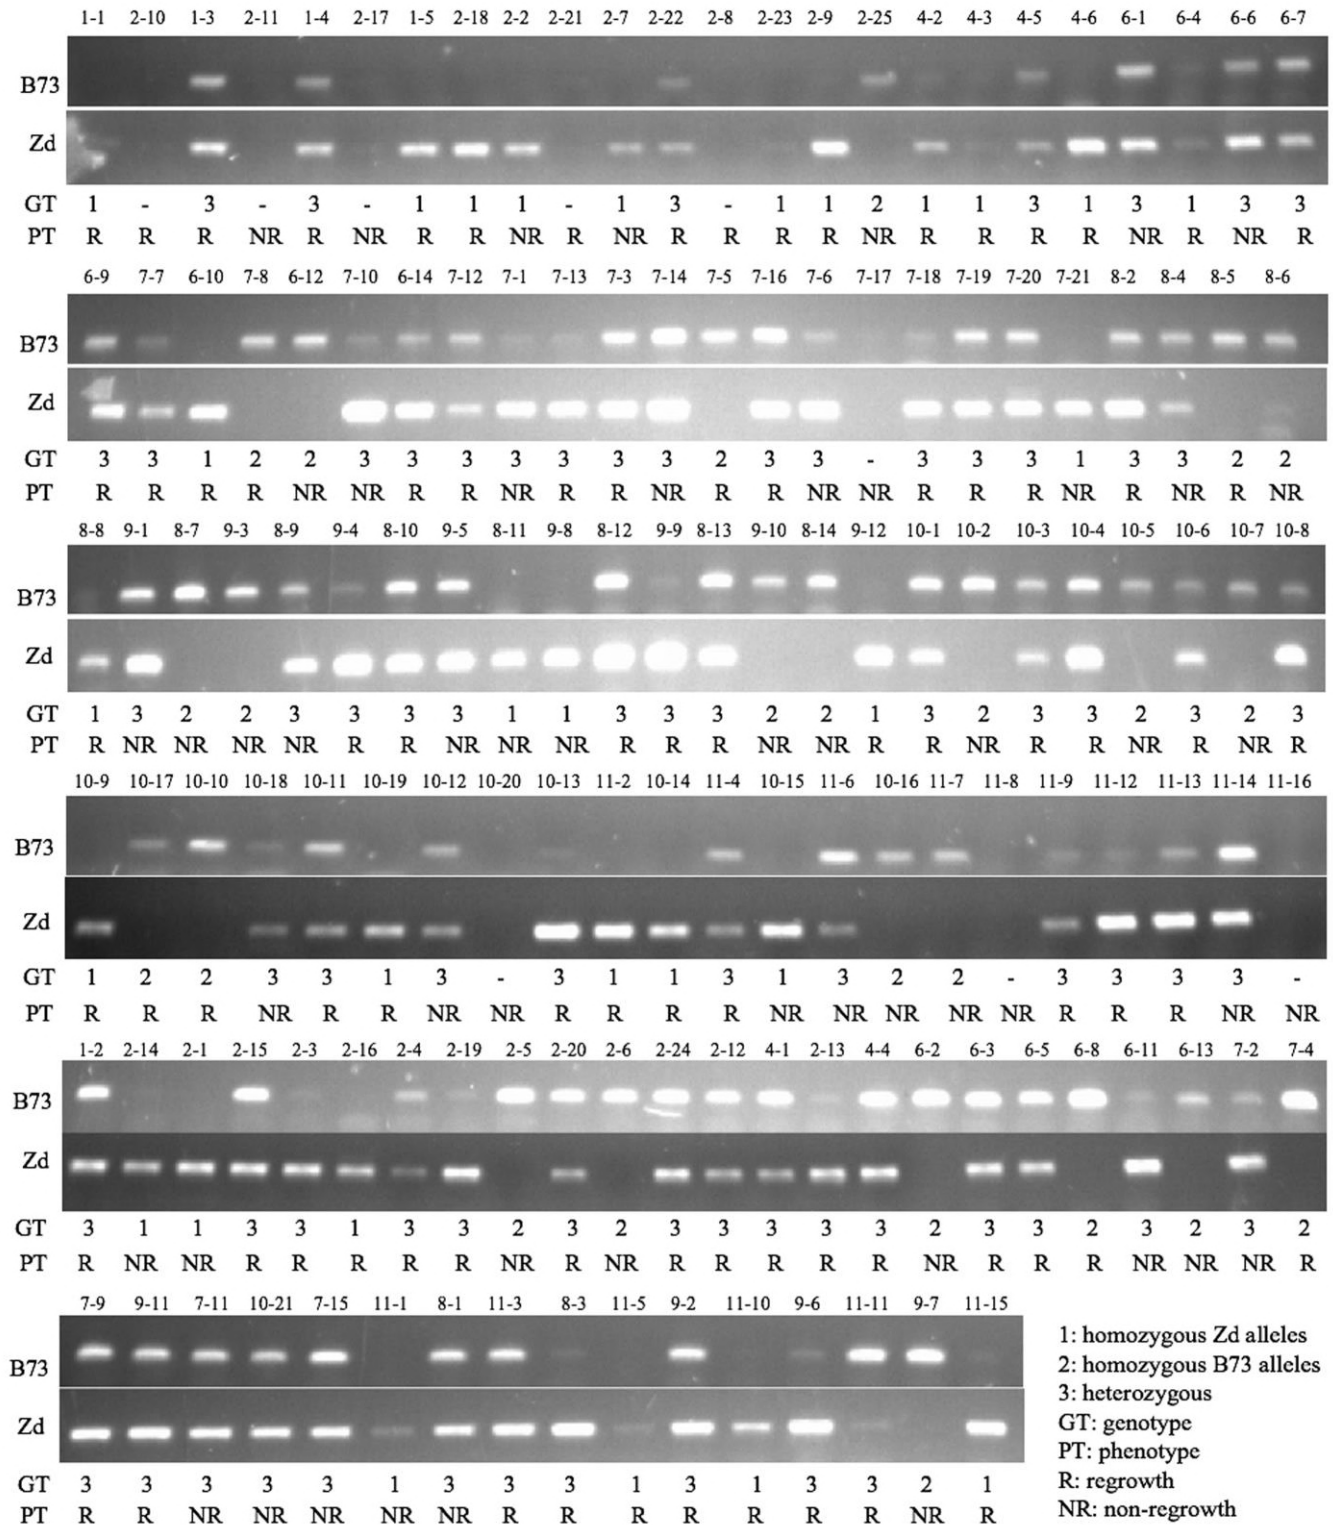

**Supplementary Figure S7.** Gel images showing presence or absence of the dominant allele of *Zea diploperennis* (Zd) or *Z. mays* B73 of the SNP marker S2-5 for the *reg1* locus among 134 B73-Zd F<sub>2</sub> plants. The codes of the plants are listed on the top of the image as 1-1 refers to BZ2-001-1, etc.

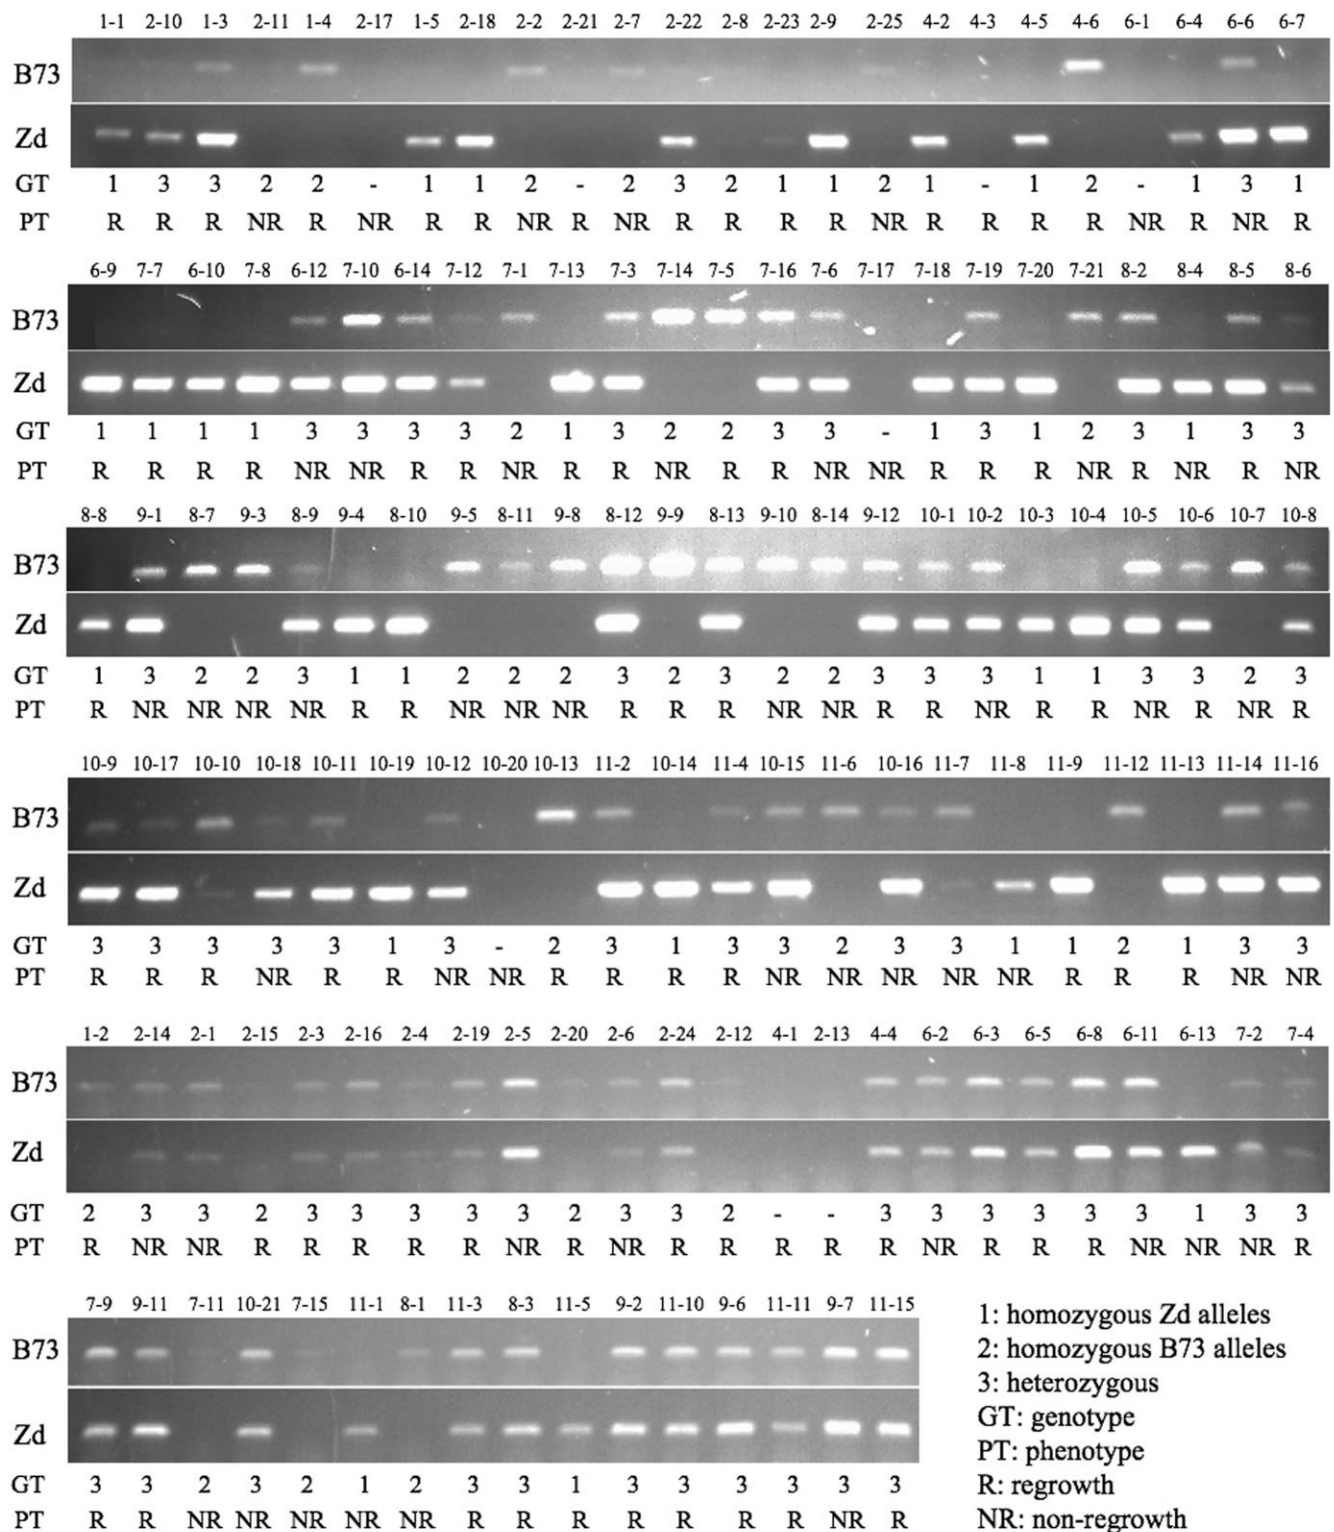

**Supplementary Figure S8.** Gel images showing presence or absence of the dominant *Zea diploperennis* (Zd) allele of marker S7-1 or *Z. mays* B73 allele of marker S7-2 for the *reg2* locus among 134 B73-Zd F<sub>2</sub> plants. The codes of the plants are listed on the top of the image as 1-1 refers to BZ2-001-1, etc.

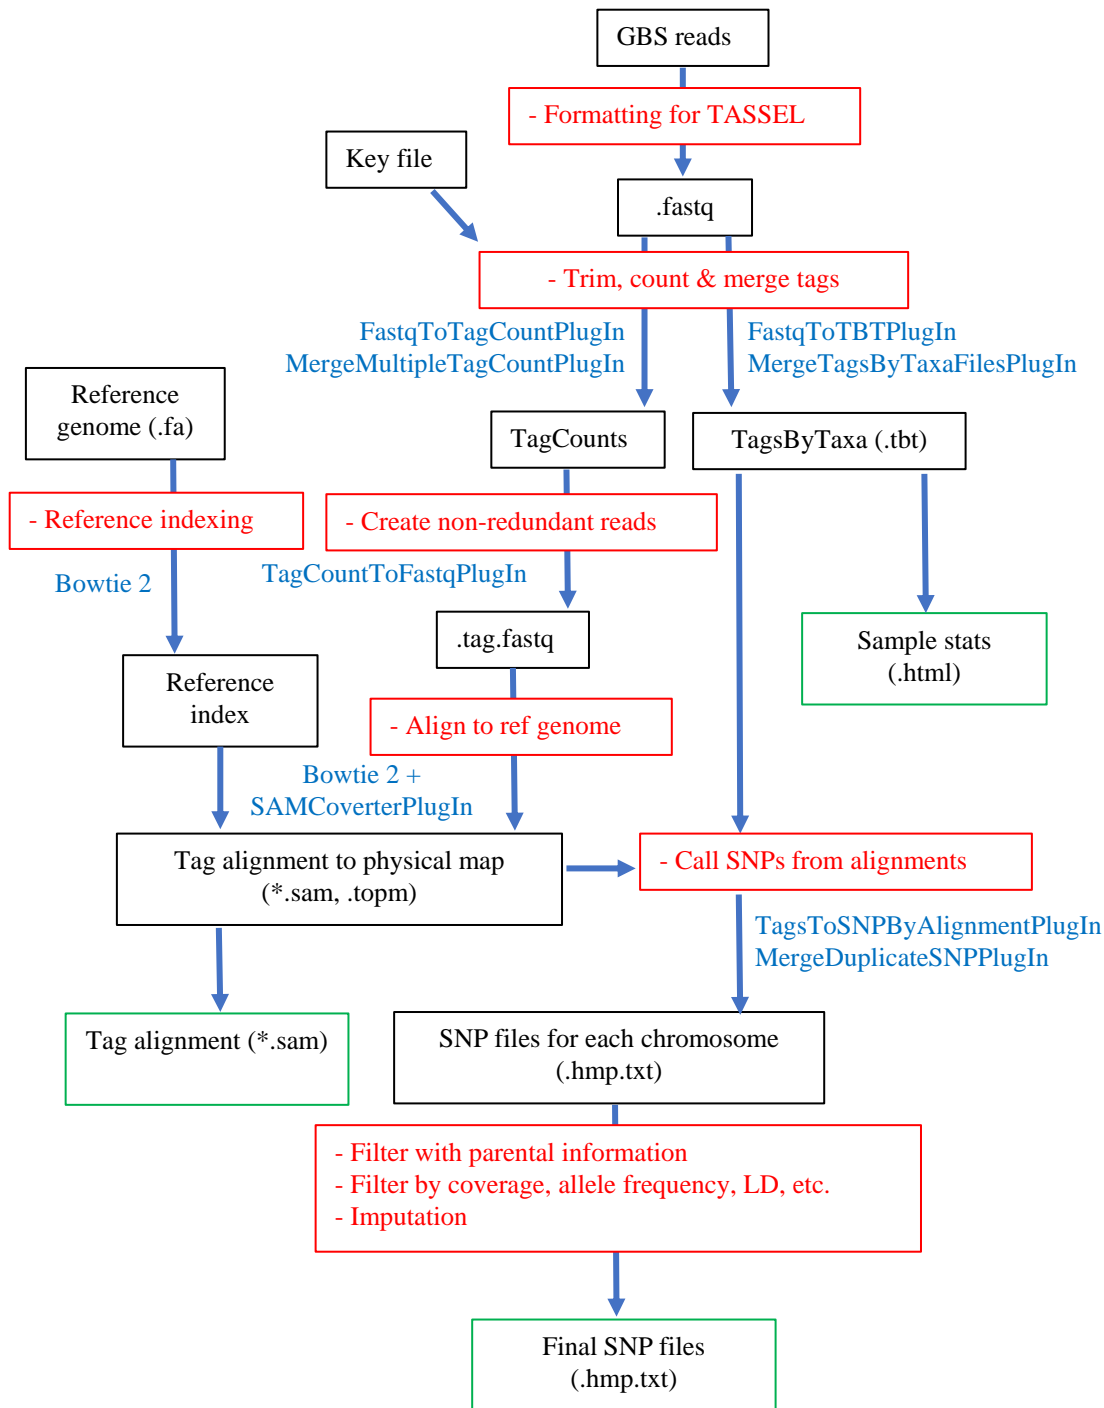

**Supplementary Figure S4.** An illustration of the general process of TASSEL pipeline used in this study. The barcoded sequence reads are collapsed into a set of unique sequence tags with counts. The tag count files are filtered for minimum count threshold and merged into the master tag count file. Master tags are aligned to the reference genome to generate a "Tags On Physical Map" (TOPM) file, which contains the genomic position of each tag with the best unique alignment. The occupancies of tags for each taxon are observed from barcodes information in the original FASTQ files. The TOPM and TBT files are used to call SNPs at the tag locations on the genome.

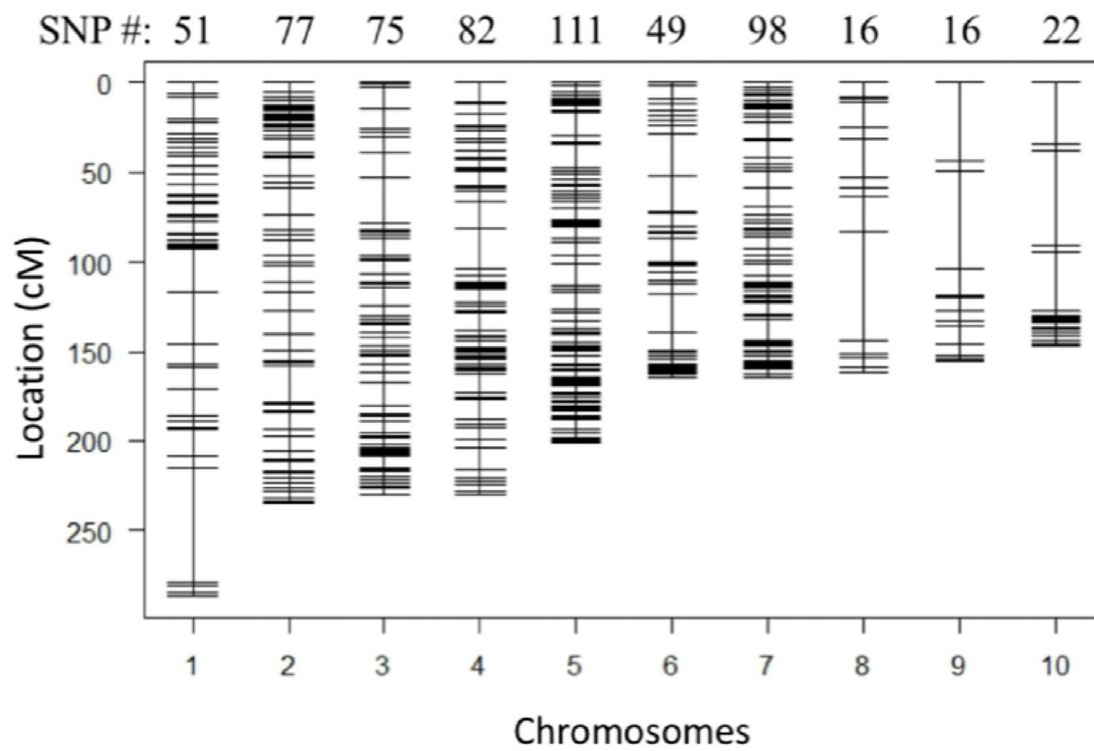

**Supplementary Figure S5.** Genetic map of the SNPs on each chromosome of *Zea mays* B73.

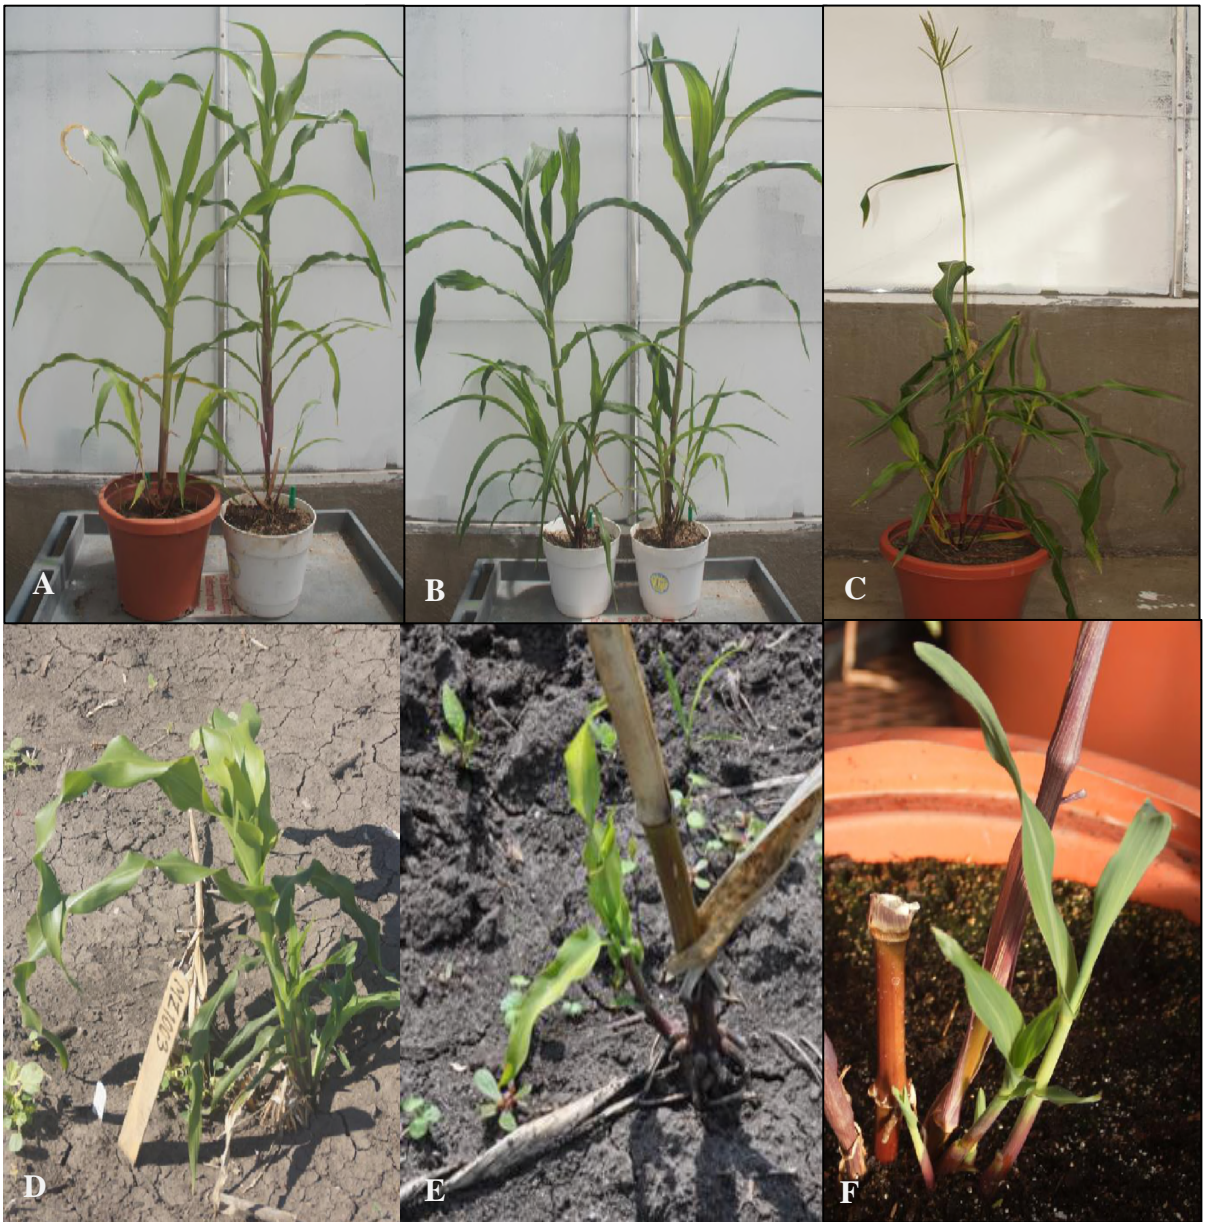

**Figure 1.** Photos of *Zea mays* and *Z. diploperennis* (Zd) F<sub>1</sub> plants. **A:** reciprocal Mo17-Zd (right) and Zd-Mo17 (left) F<sub>1</sub> plants; **B:** reciprocal B73-Zd (right) and Zd-B73 (left) F<sub>1</sub> plants; **C:** RF-Zd F<sub>1</sub> plant; **D:** regrowth of a Mo17-Zd F<sub>1</sub> plant; **E:** regrowth of a B73-Zd F<sub>1</sub> plant; and **F:** regrowth of a RF-Zd F<sub>1</sub> plant. B73, Mo17 and RF represent, respectively, inbred lines B73 and Mo17 and cultivar Rhee Flint of *Z. mays*.

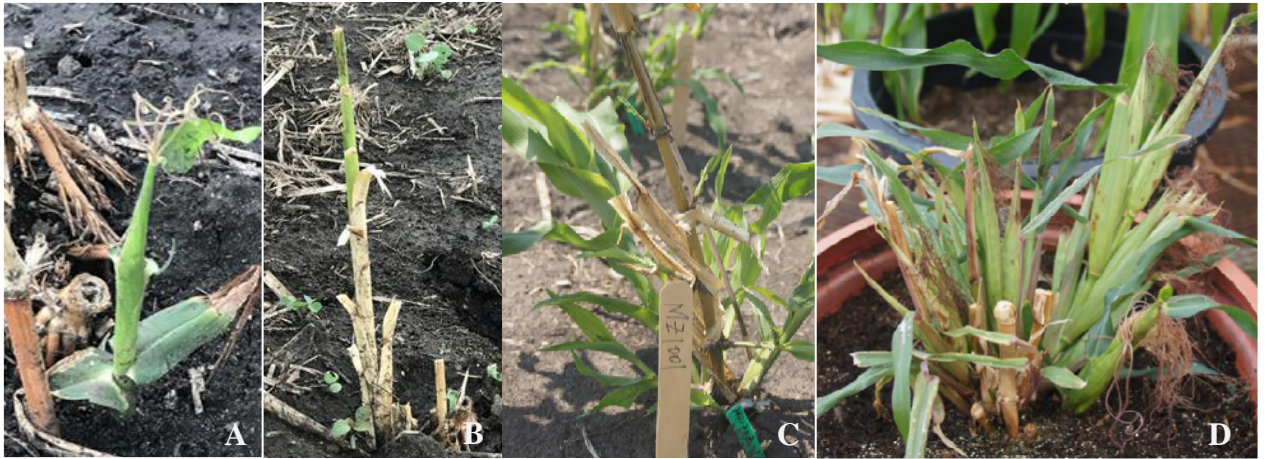

**Figure 2.** Photos of abnormal F<sub>1</sub> plants of crosses of *Zea diploperennis* with *Z. mays* inbred lines B73 (A & B) and M017 (C) or cv. Rhee Flint (D).

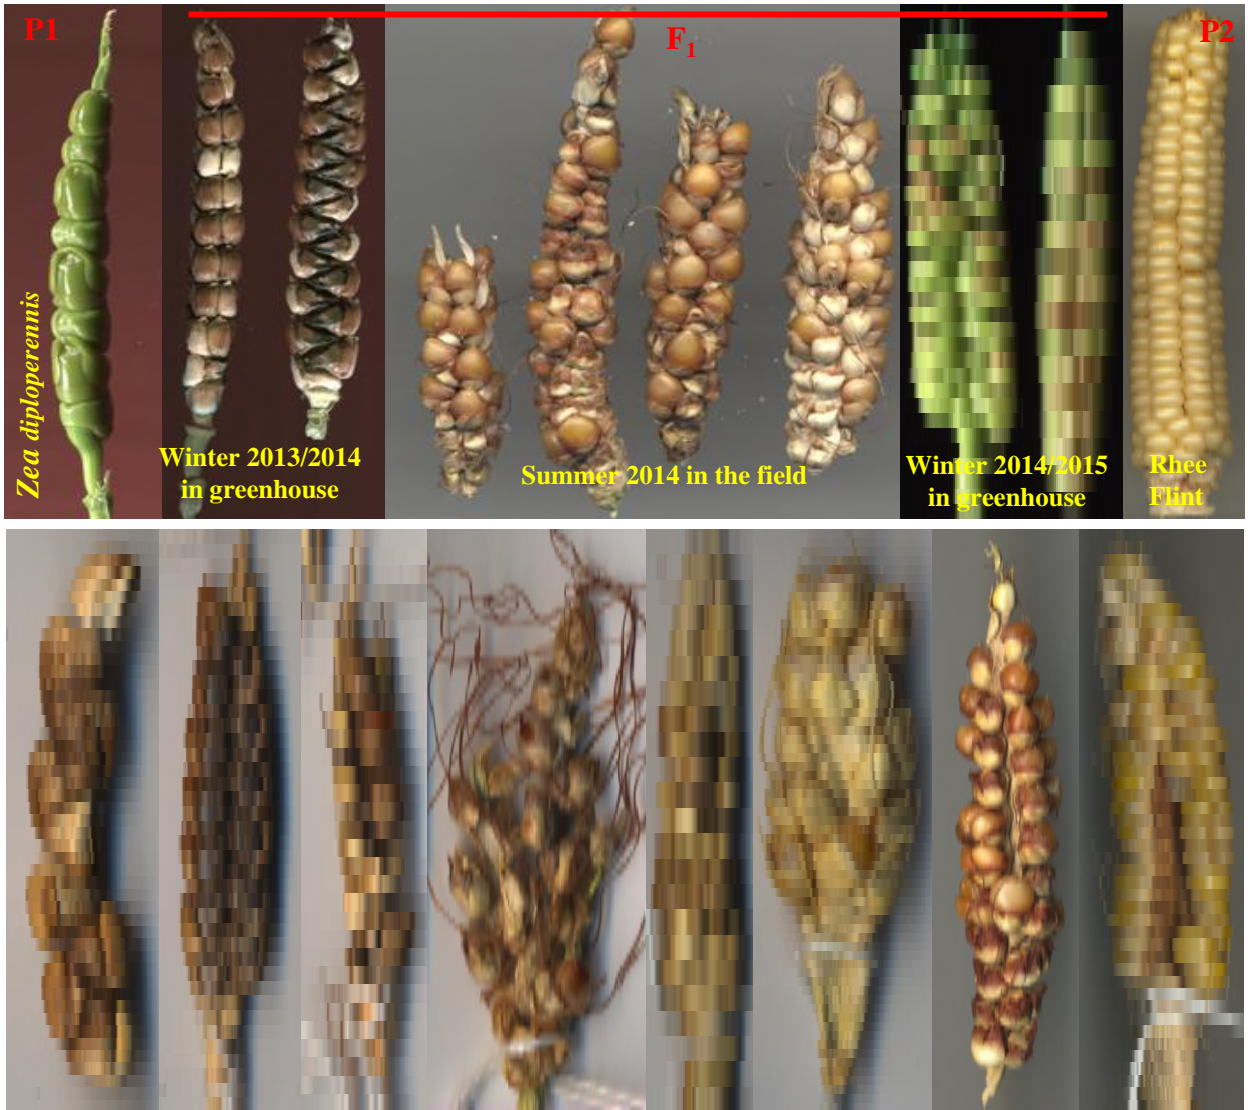

**Figure 3.** Photos of the ears produced from a *Zea mays* cv Rhee Flint x *Z. diploperennis* F<sub>1</sub> plant in different seasons (the upper panel) and from F<sub>2</sub> in summer 2014 in greenhouse (the lower panel).



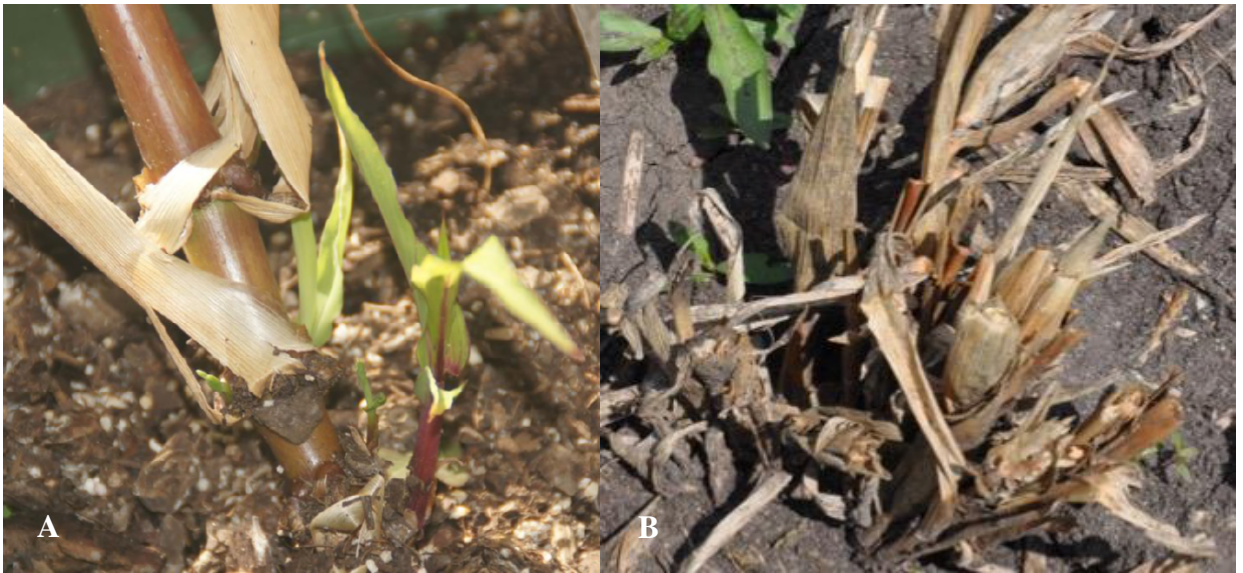

**Figure 4.** Photos of *Zea mays* Mo17-*Z. diploperennis* F<sub>2</sub> plants, showing regrowth from the basal node of a single-stalked plant (A) or non-regrowth from a multi-stalked plant (B).

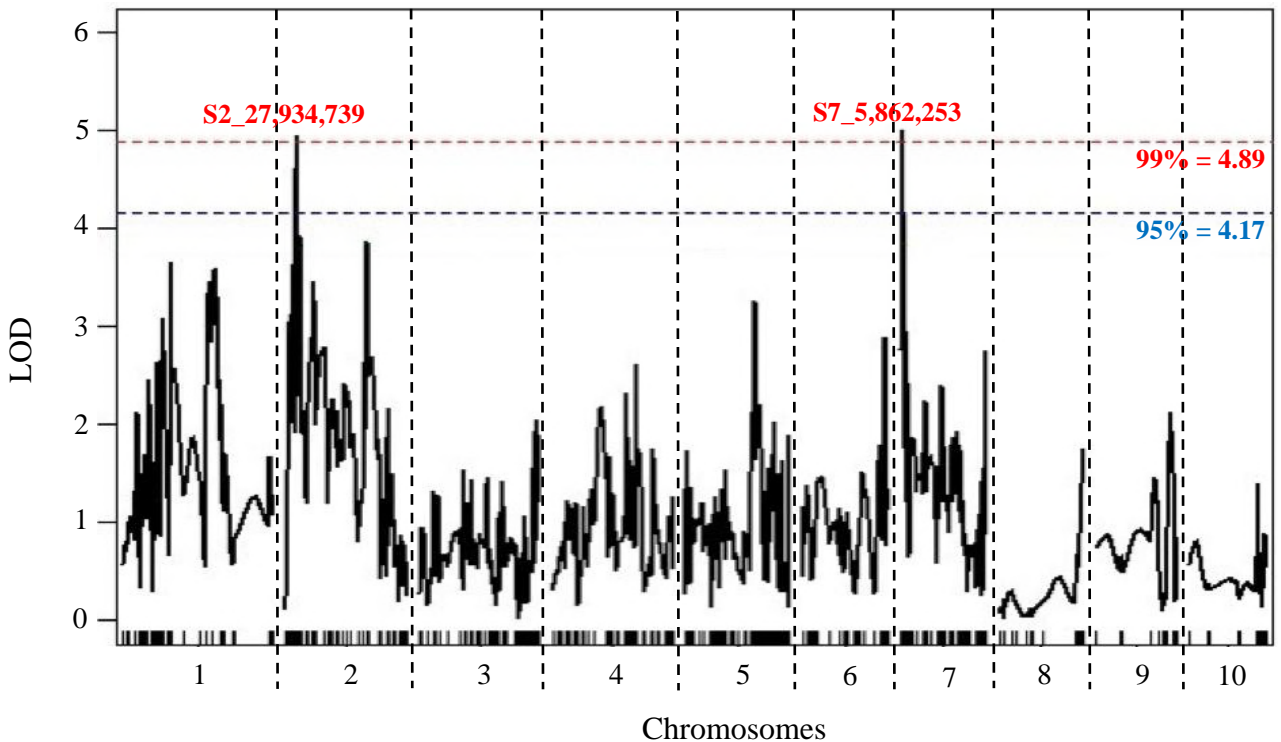

**Figure 5.** LOD scores of 597 SNP markers and 1,969 simulated positions for candidate locus determination shown with 95% and 99% LOD thresholds. The thresholds were calculated with 1000 permutation. Two significant QTL are indicated by the location of the peak SNPs.
